# Supplementary material
Source: PubMed Central journal article supplement (PMC8149581)
Supplement: 10593_2021_2931_MOESM1_ESM.pdf [file 10593_2021_2931_MOESM1_ESM.pdf]

## Synthesis, structure, and antiviral properties of novel 2-adamantyl-5-aryl-2*H*-tetrazoles

Olga V. Mikolaichuk<sup>1</sup>, Vladimir V. Zarubaev<sup>2</sup>, Anna A. Muryleva<sup>2</sup>, Yana L. Esaulkova<sup>2</sup>, Daria V. Spasibenko<sup>3</sup>, Alina A. Batyrenko<sup>3</sup>, Ilya V. Korniyakov<sup>1,4</sup>, Rostislav E. Trifonov<sup>3\*</sup>

<sup>1</sup> Saint Petersburg State University,  
7/9 University Embankment, Saint Petersburg 199034, Russia; e-mail: st801293@spbu.ru

<sup>2</sup> Saint Petersburg Pasteur Research Institute of Epidemiology and Microbiology,  
14 Mira St., Saint Petersburg 197101, Russia; e-mail: zarubaev@gmail.com

<sup>3</sup> Saint Petersburg State Institute of Technology (Technical University),  
26 Moskovsky Ave., Saint Petersburg 190013, Russia; e-mail: rost\_trifonov@mail.ru

<sup>4</sup> Kola Science Center, Russian Academy of Sciences,  
14 Fersmana St., Apatity 184209, Murmansk Oblast, Russia; e-mail: i.korniyakov@spbu.ru

### SUPPLEMENTARY INFORMATION

|                                                                |           |
|----------------------------------------------------------------|-----------|
| <b>1. <sup>1</sup>H and <sup>13</sup>C{H} NMR spectra.....</b> | <b>2</b>  |
| <b>2. Mass spectra of compounds.....</b>                       | <b>17</b> |
| <b>3. IR spectra of compounds.....</b>                         | <b>29</b> |
| <b>5. XRD Data.....</b>                                        | <b>31</b> |
| <b>6. DSC/TG analysis of compound 3g.....</b>                  | <b>33</b> |

# 1. $^1\text{H}$ and $^{13}\text{C}\{\text{H}\}$ NMR spectra

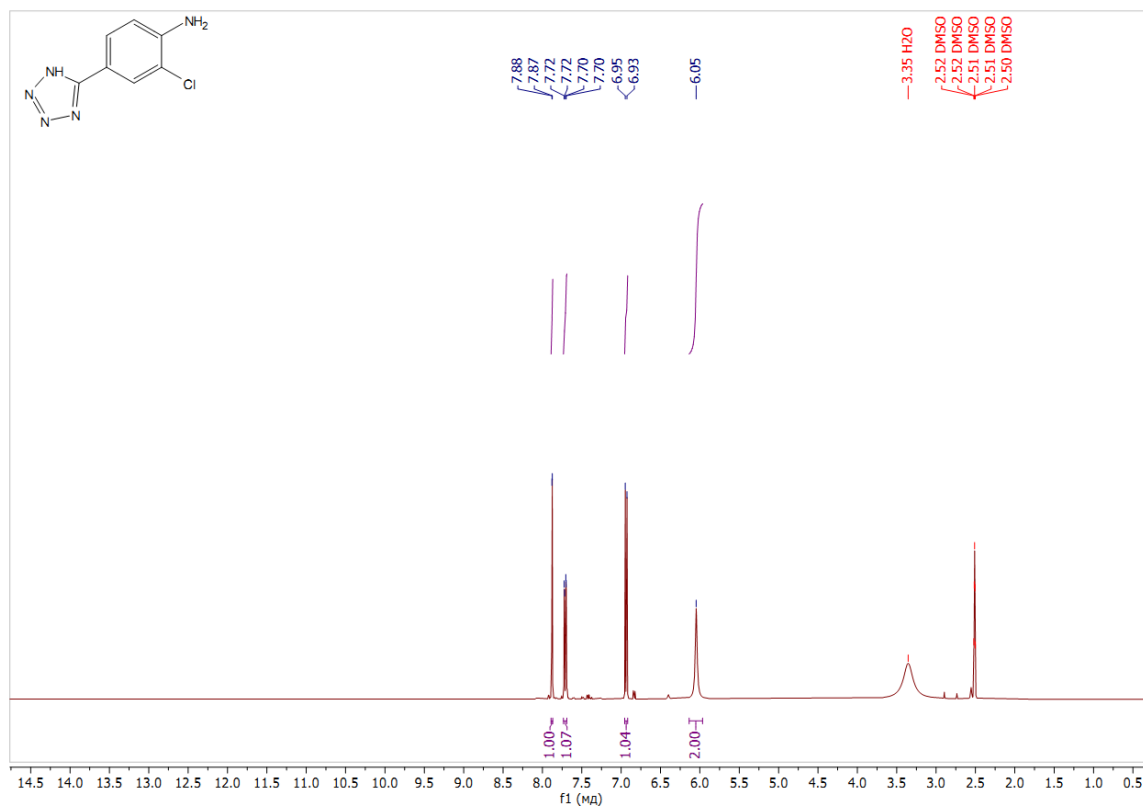

Fig. S1.  $^1\text{H}$  spectra of **2e**

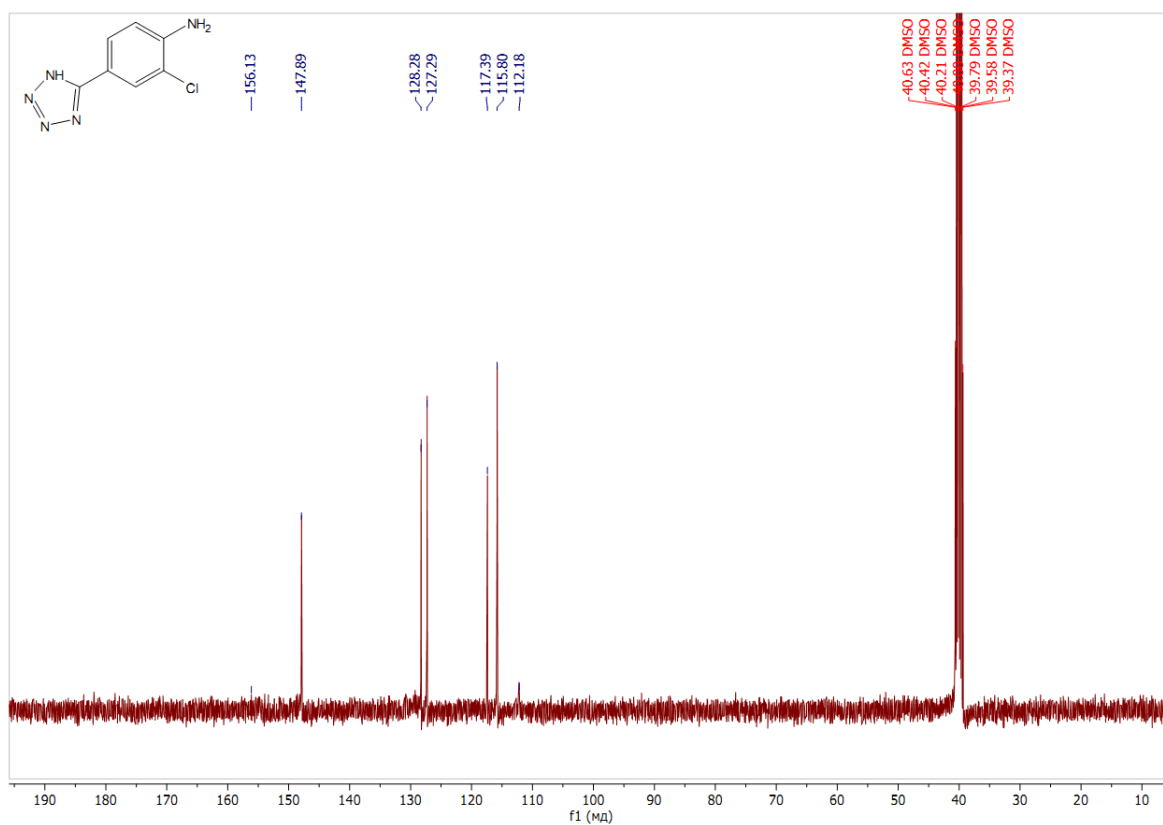

Fig. S2.  $^{13}\text{C}\{\text{H}\}$  spectra of **2e**

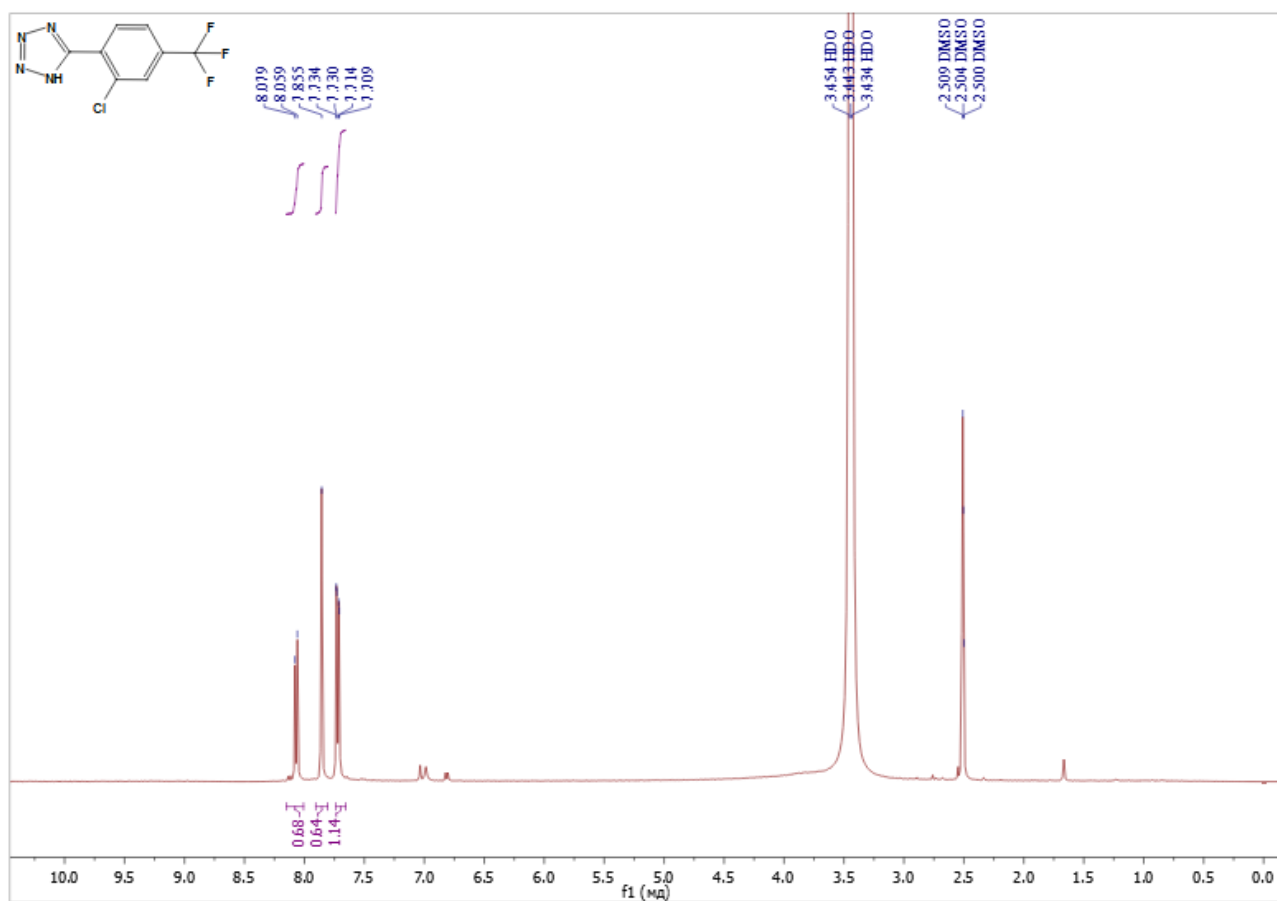

Fig. S3. <sup>1</sup>H spectra of **2f**

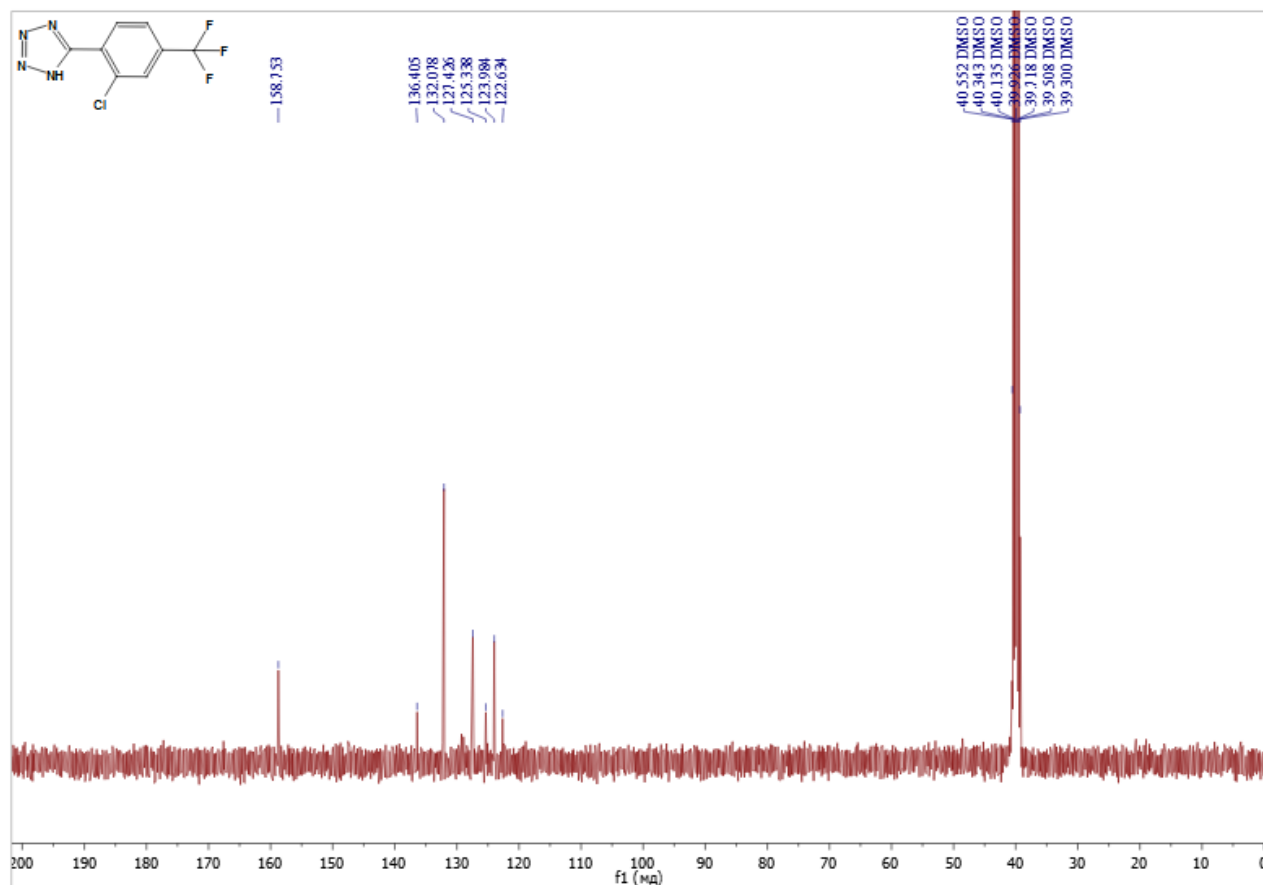

Fig. S4. <sup>13</sup>C{H} spectra of **2f**

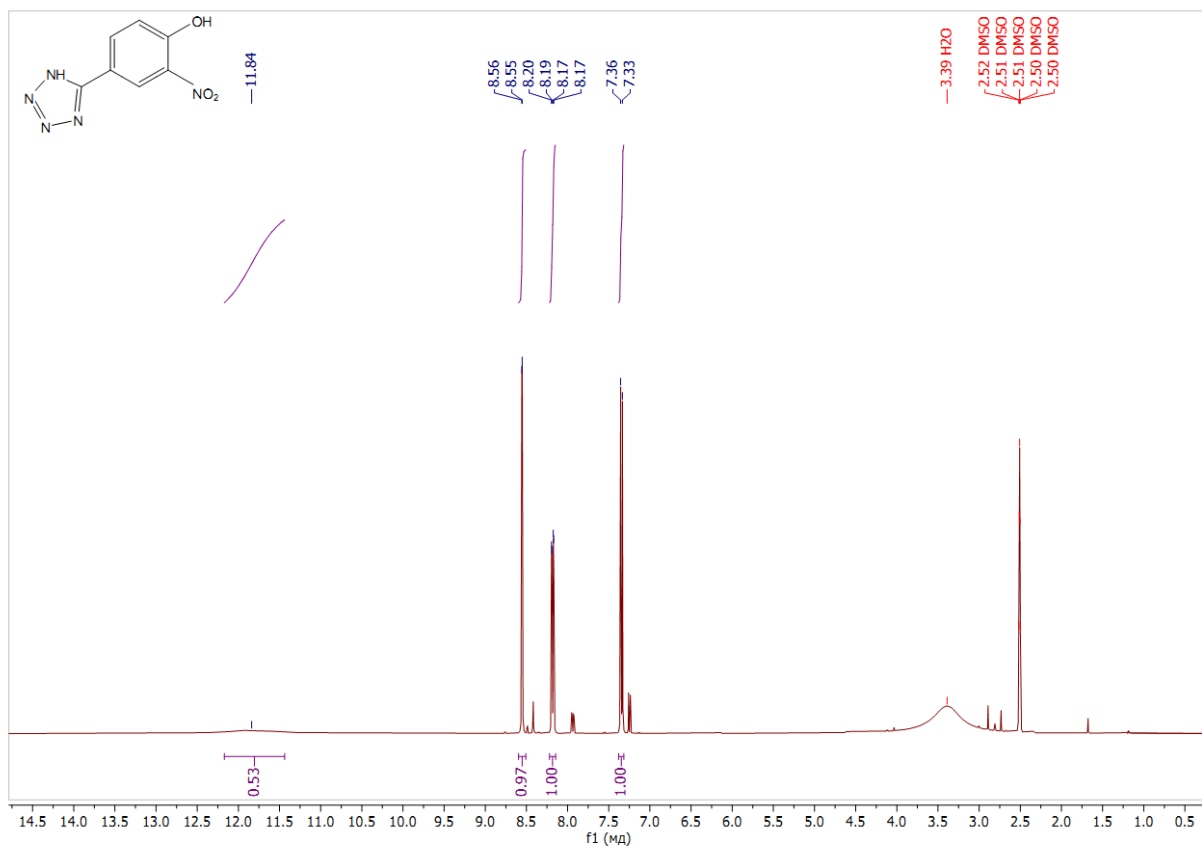

Fig. S5.  $^1\text{H}$  spectra of **2g**

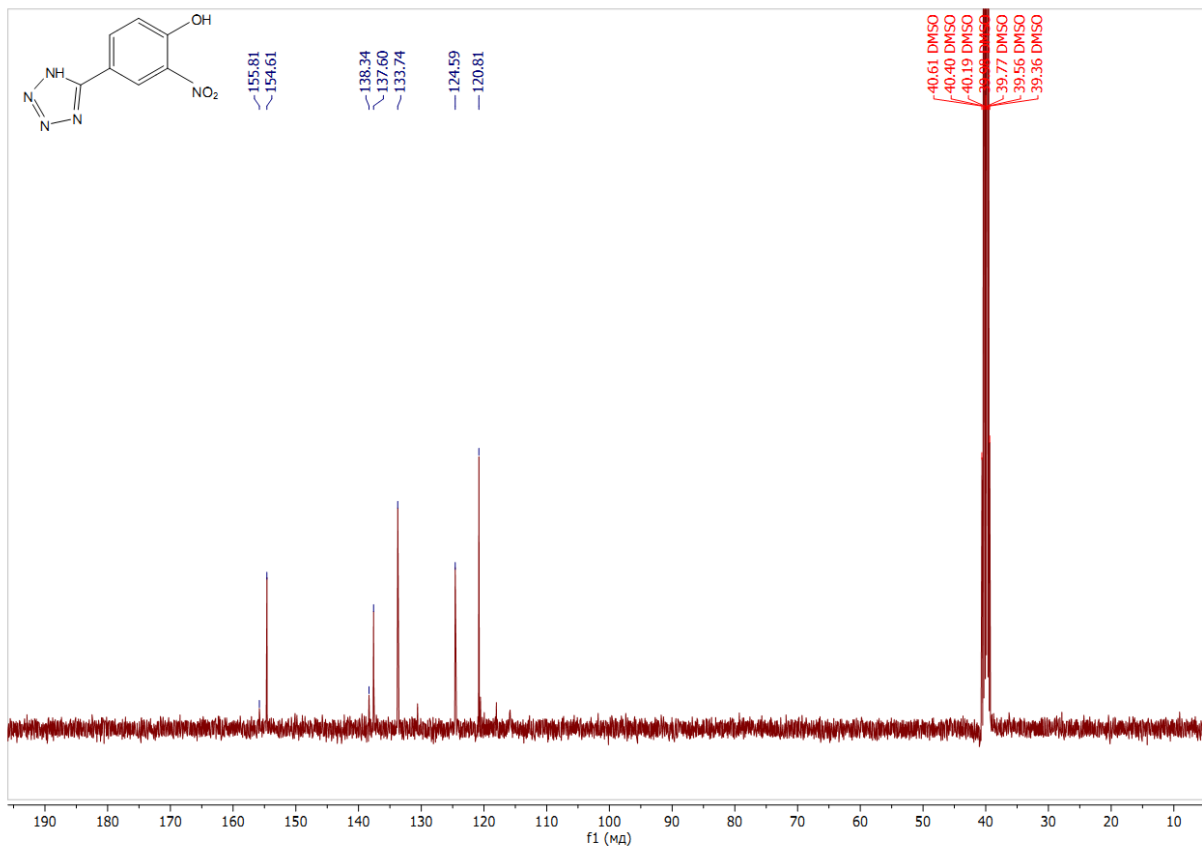

Fig. S6.  $^{13}\text{C}\{\text{H}\}$  spectra of **2g**

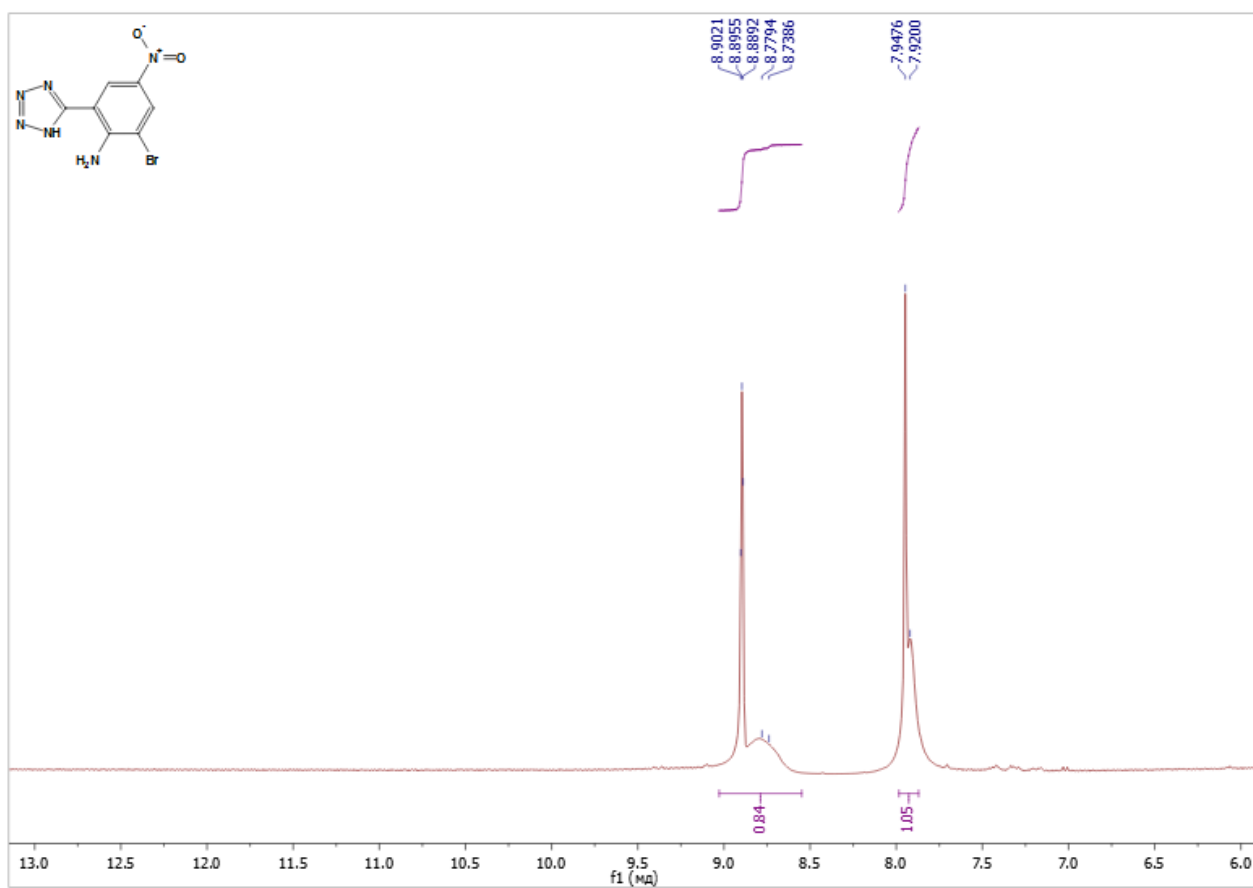

Fig. S7.  $^1\text{H}$  spectra of **2i**

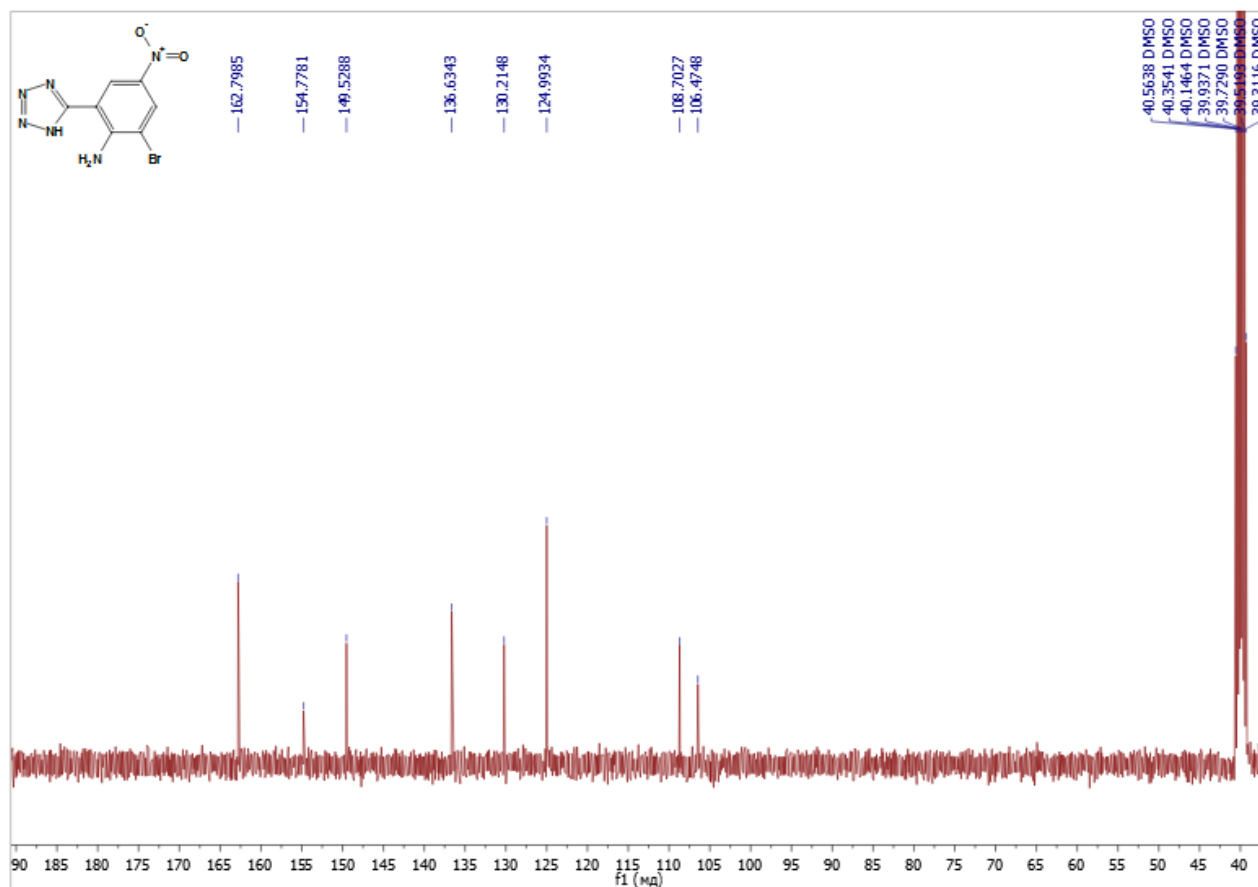

Fig. S8.  $^{13}\text{C}\{^1\text{H}\}$  spectra of **2i**

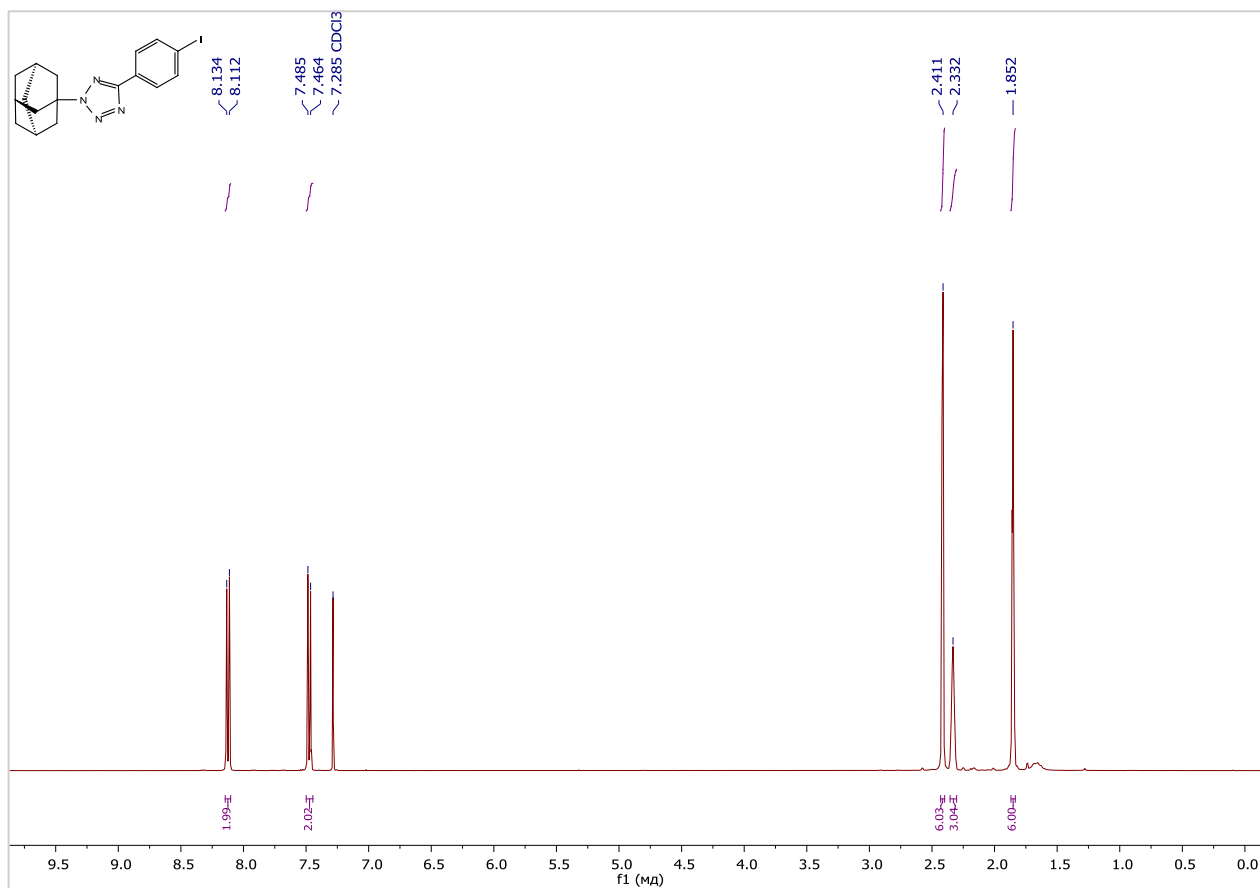

Fig. S9. <sup>1</sup>H spectra of **3a**

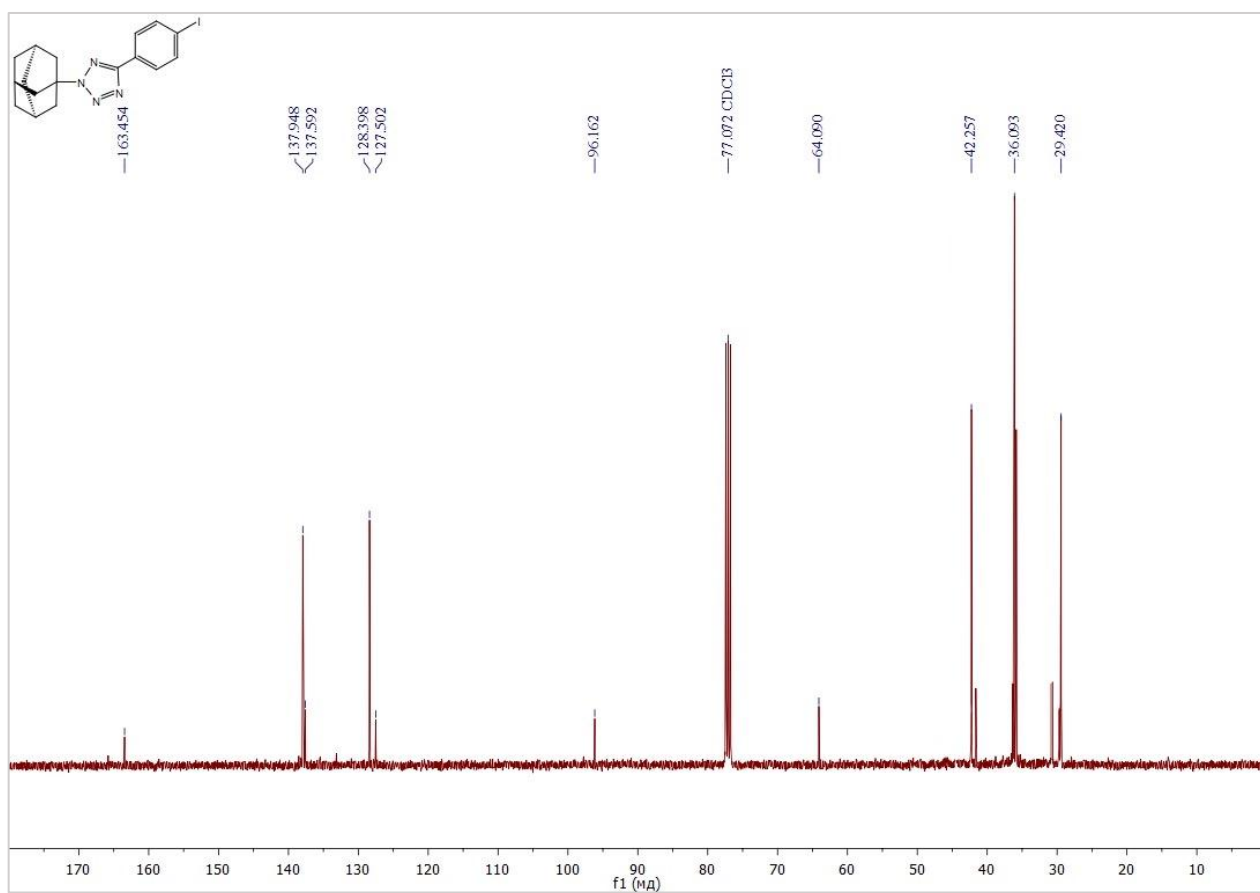

Fig. S10. <sup>13</sup>C{<sup>1</sup>H} spectra of **3a**

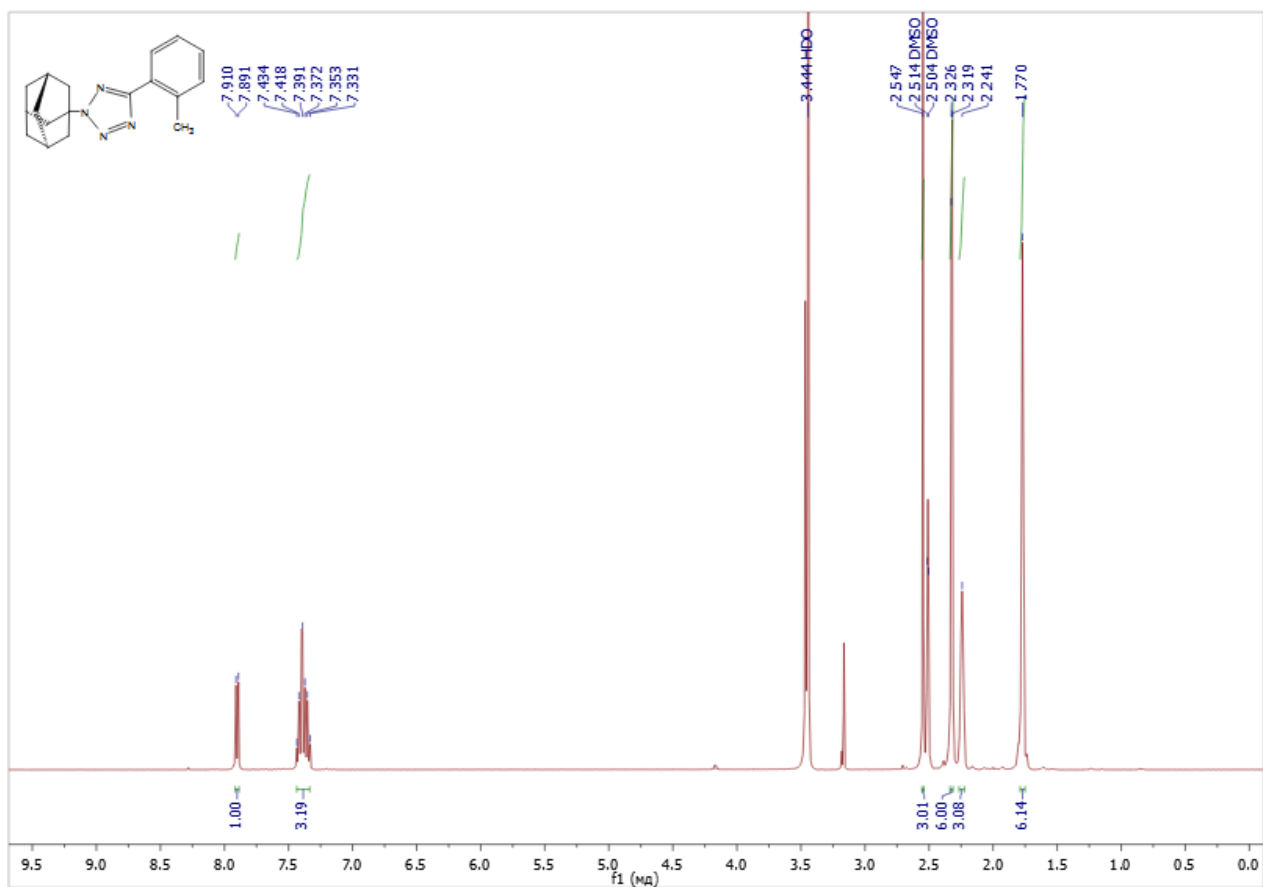

Fig. S11. <sup>1</sup>H spectra of **3b**

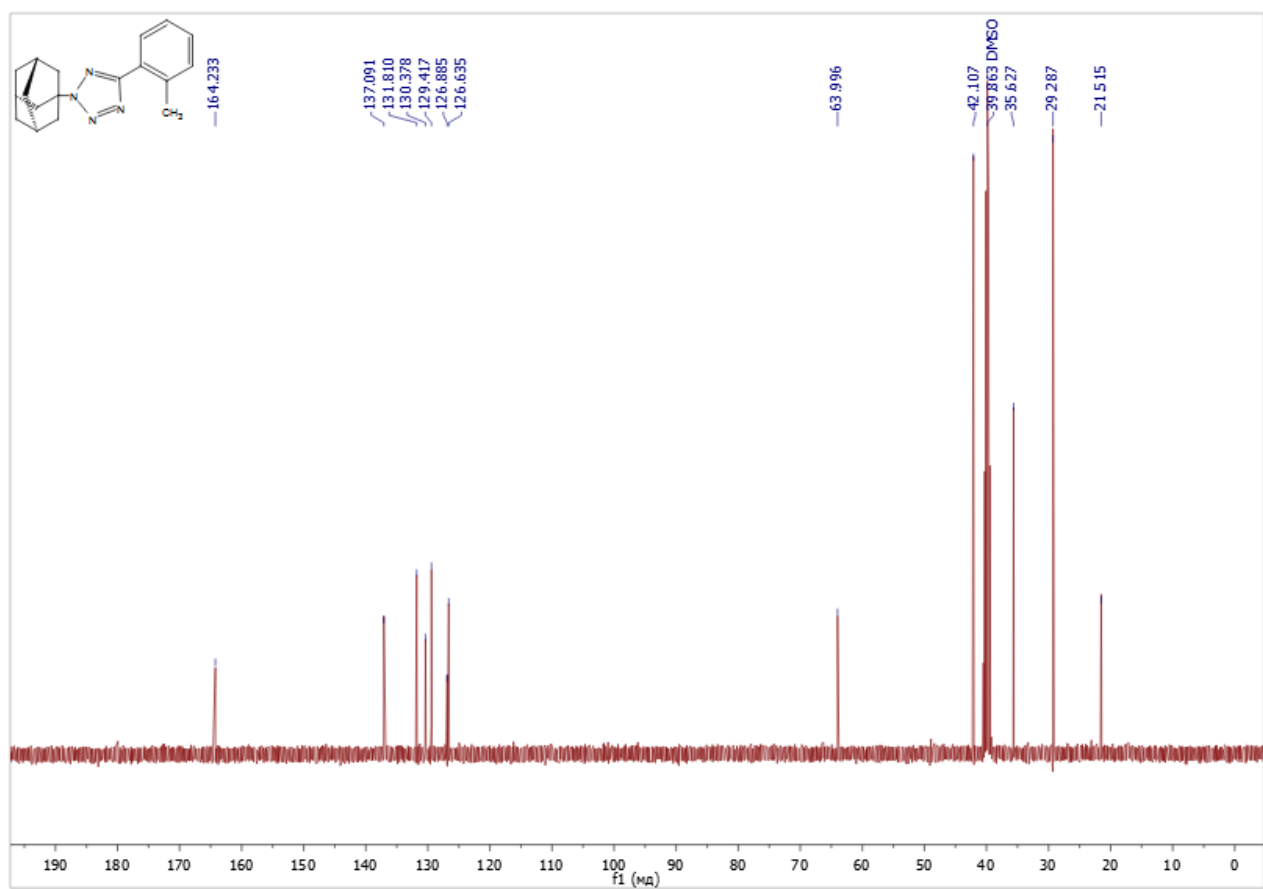

Fig. S12. <sup>13</sup>C{<sup>1</sup>H} spectra of **3b**

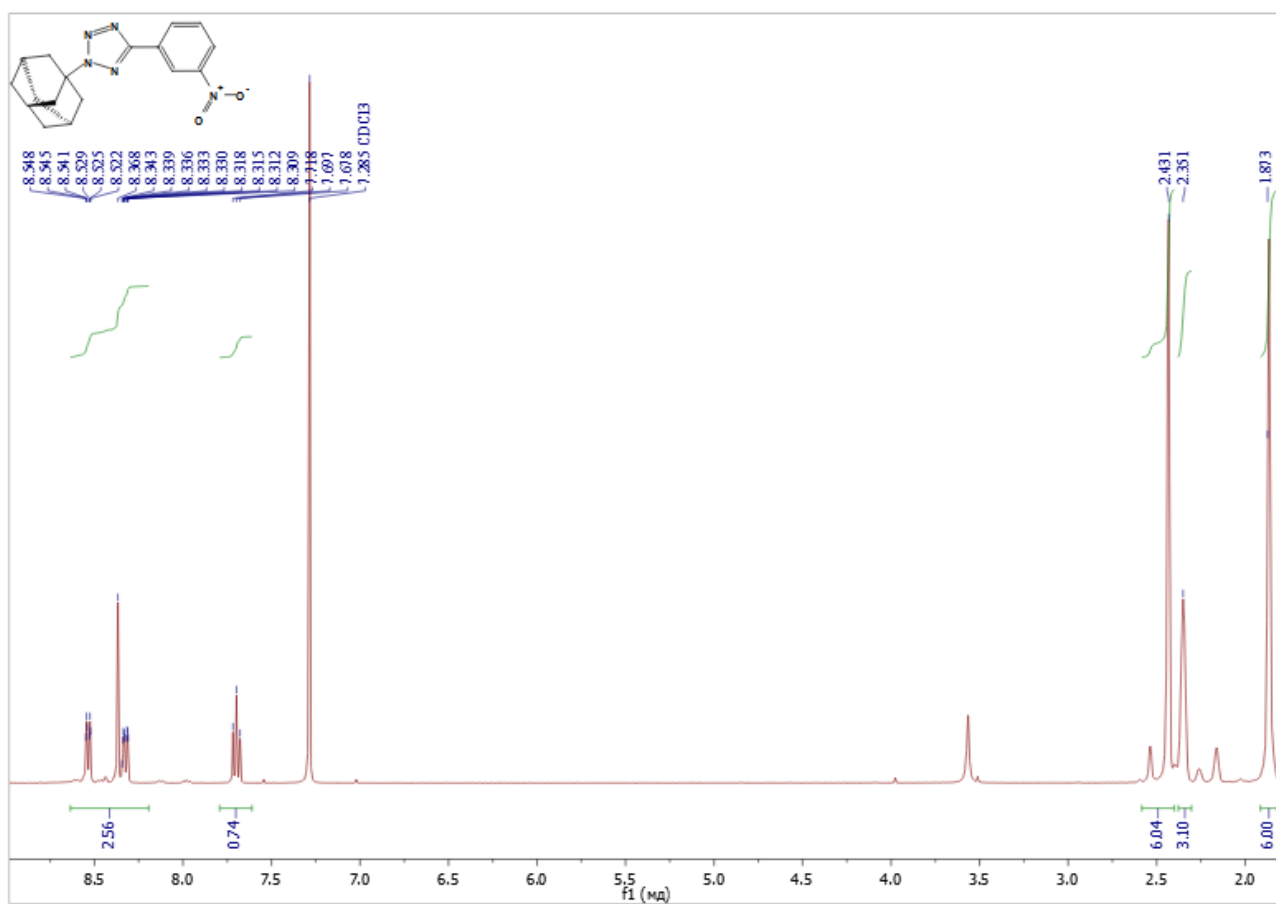

Fig. S13. <sup>1</sup>H spectra of **3c**

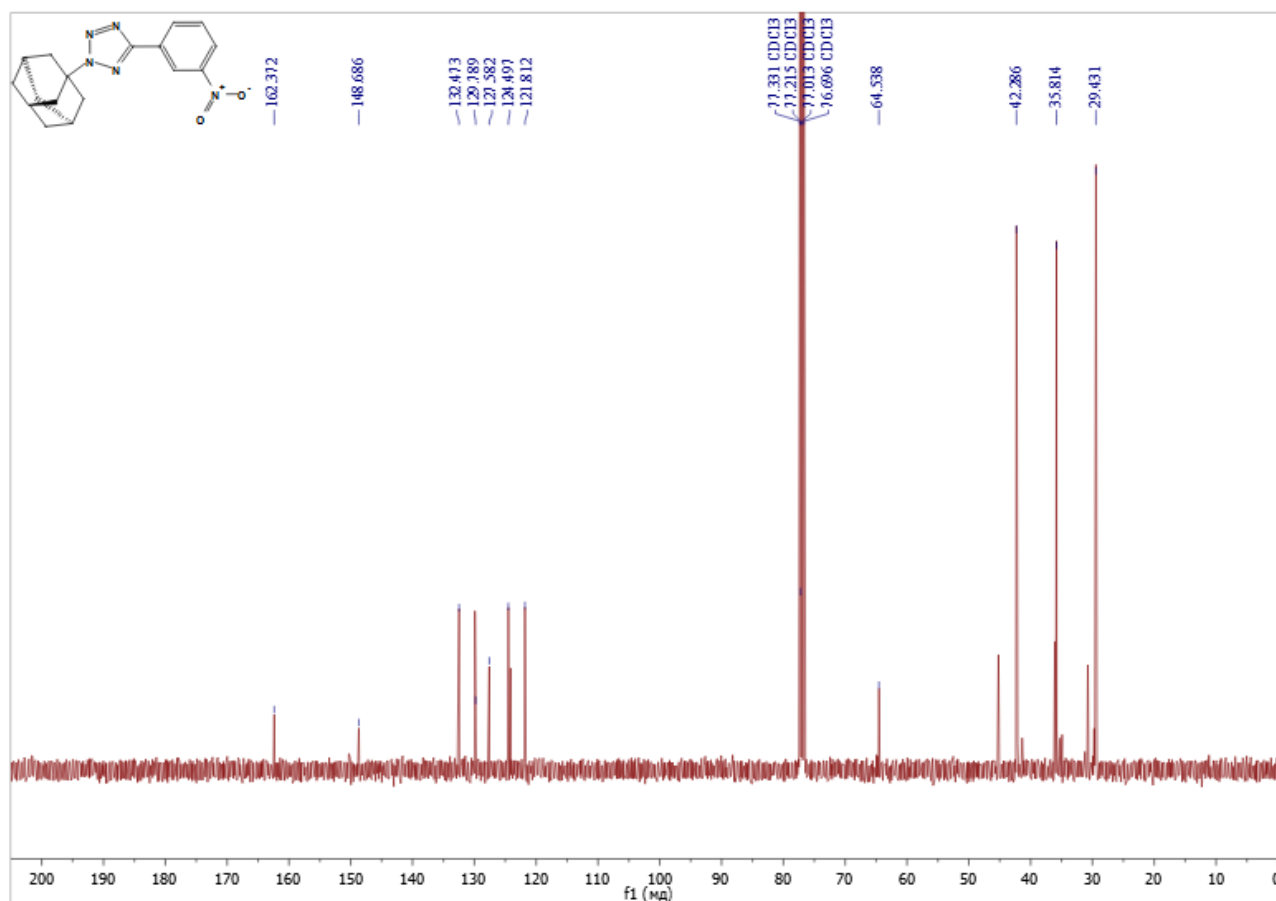

Fig. S14. <sup>13</sup>C spectra of **3c**



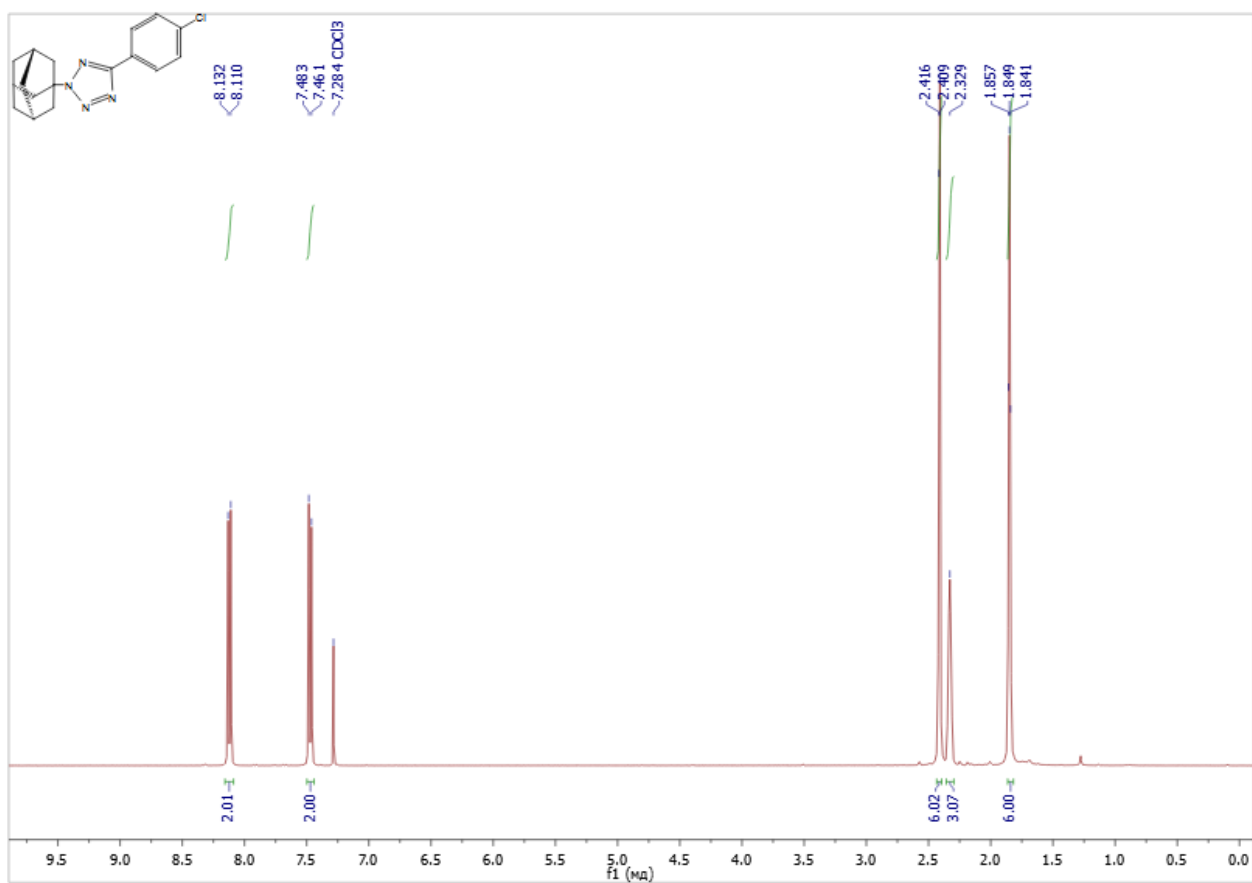

Fig. S15.  $^1\text{H}$  spectra of **3d**

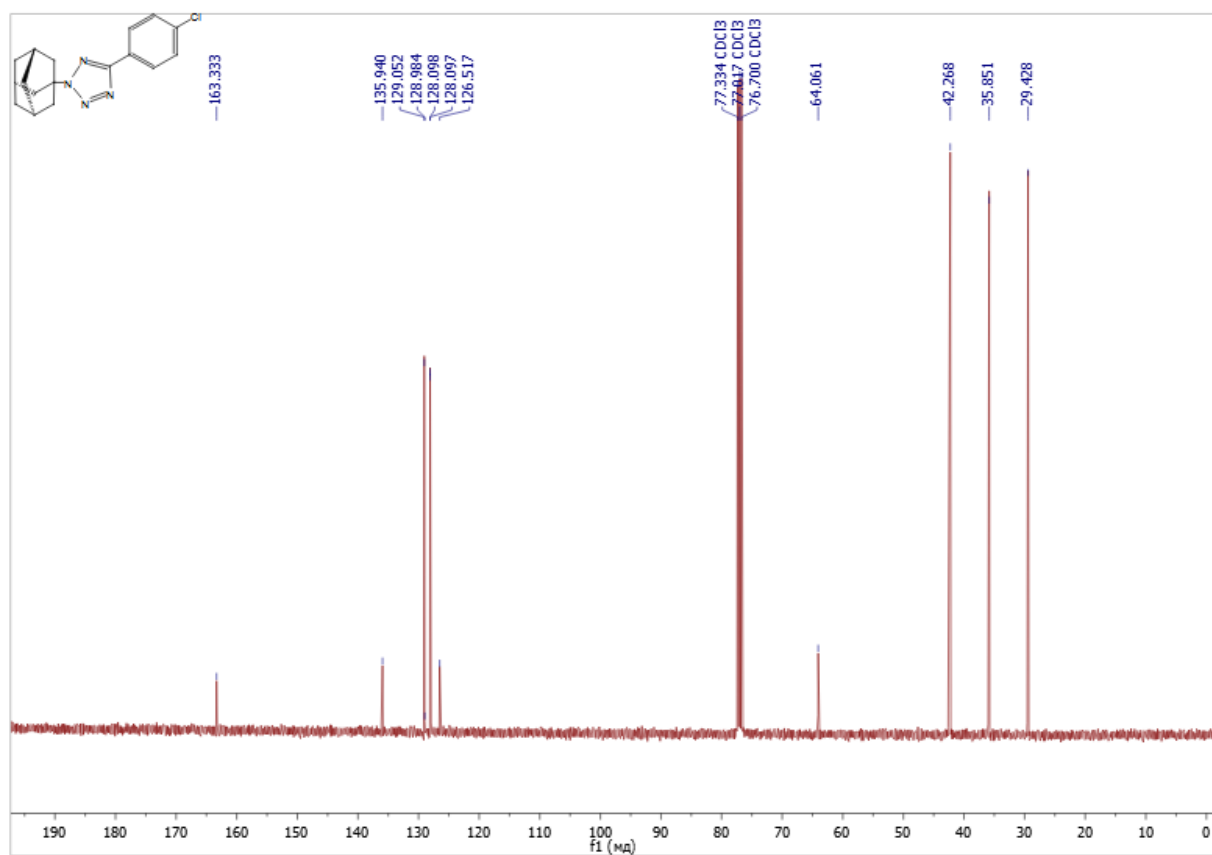

Fig. S16.  $^{13}\text{C}\{^1\text{H}\}$  spectra of **3d**

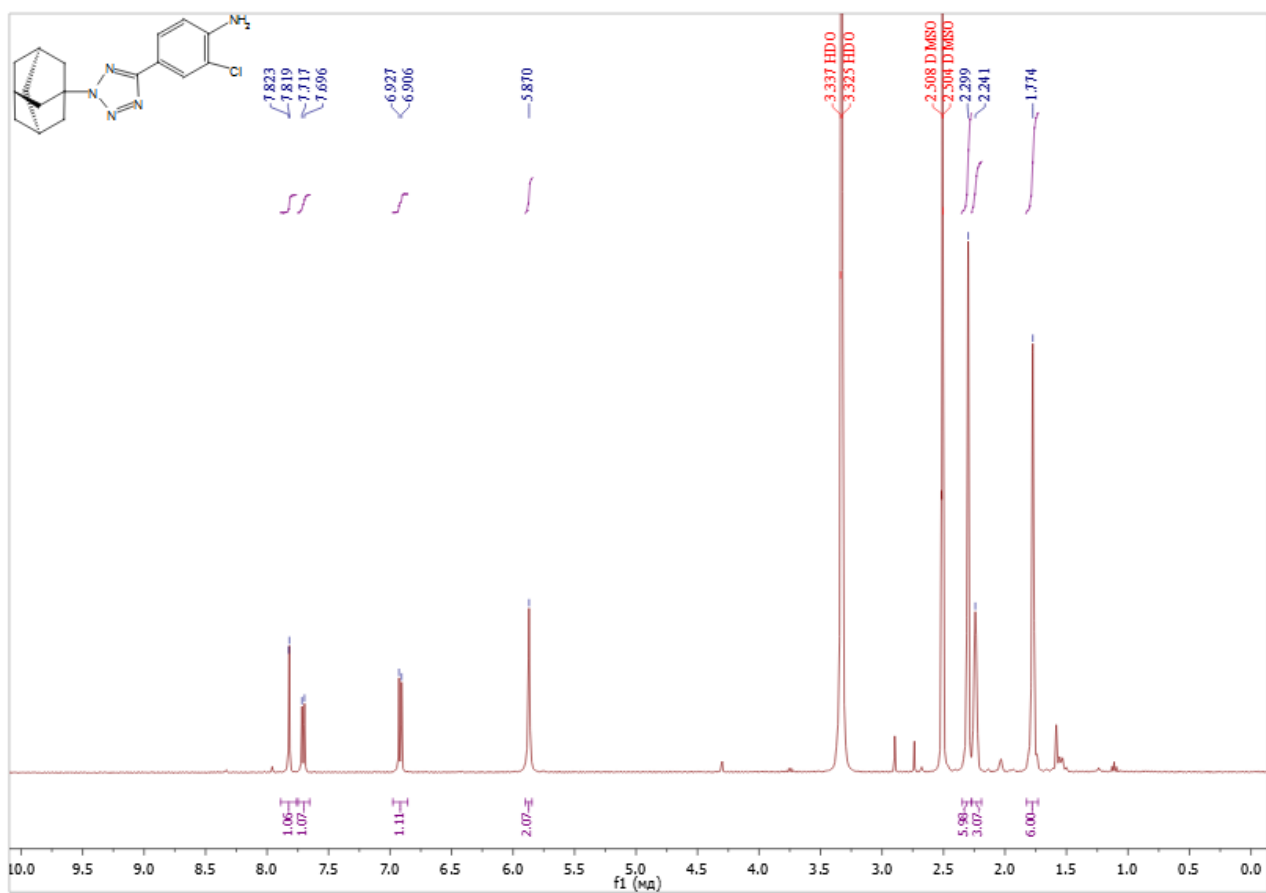

Fig. S17.  $^1\text{H}$  spectra of **3e**

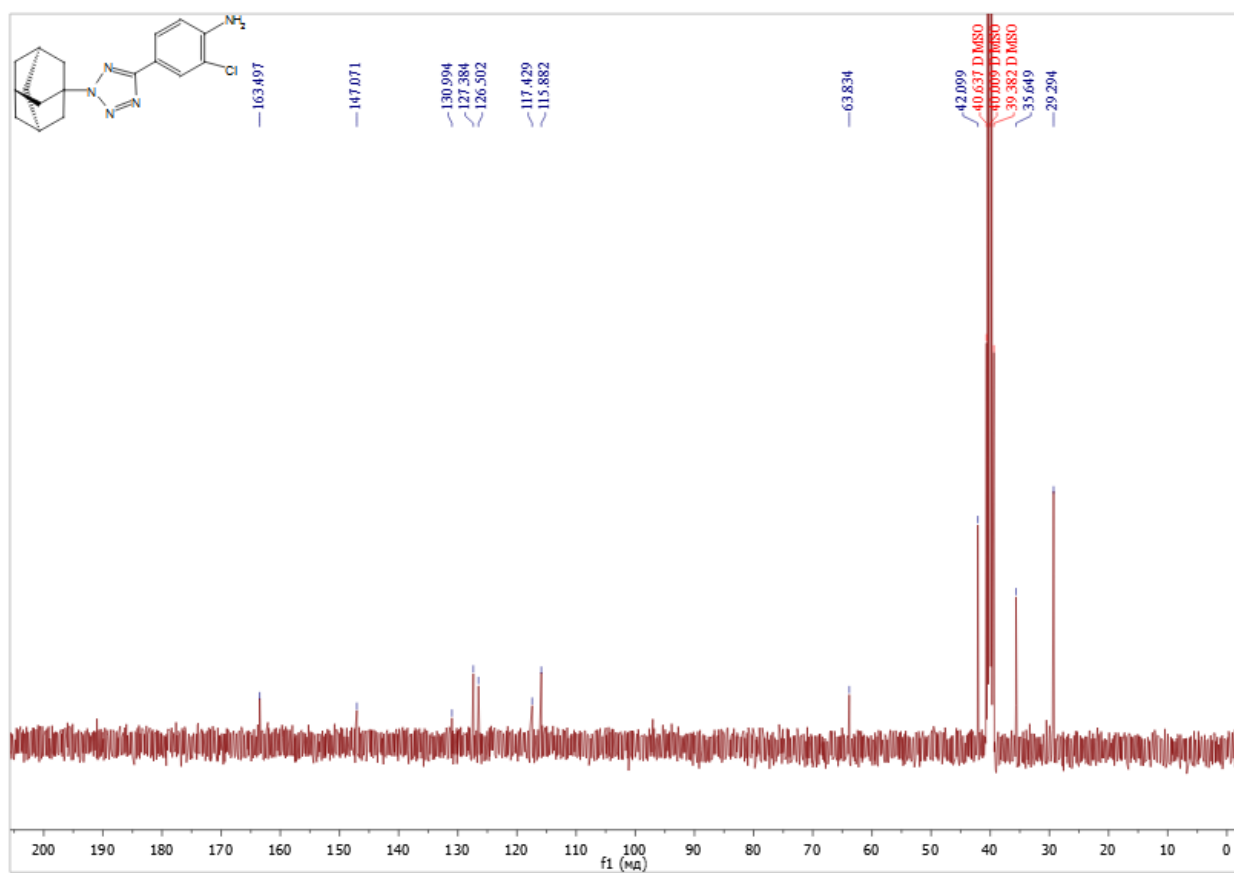

Fig. S18.  $^{13}\text{C}\{^1\text{H}\}$  spectra of **3e**

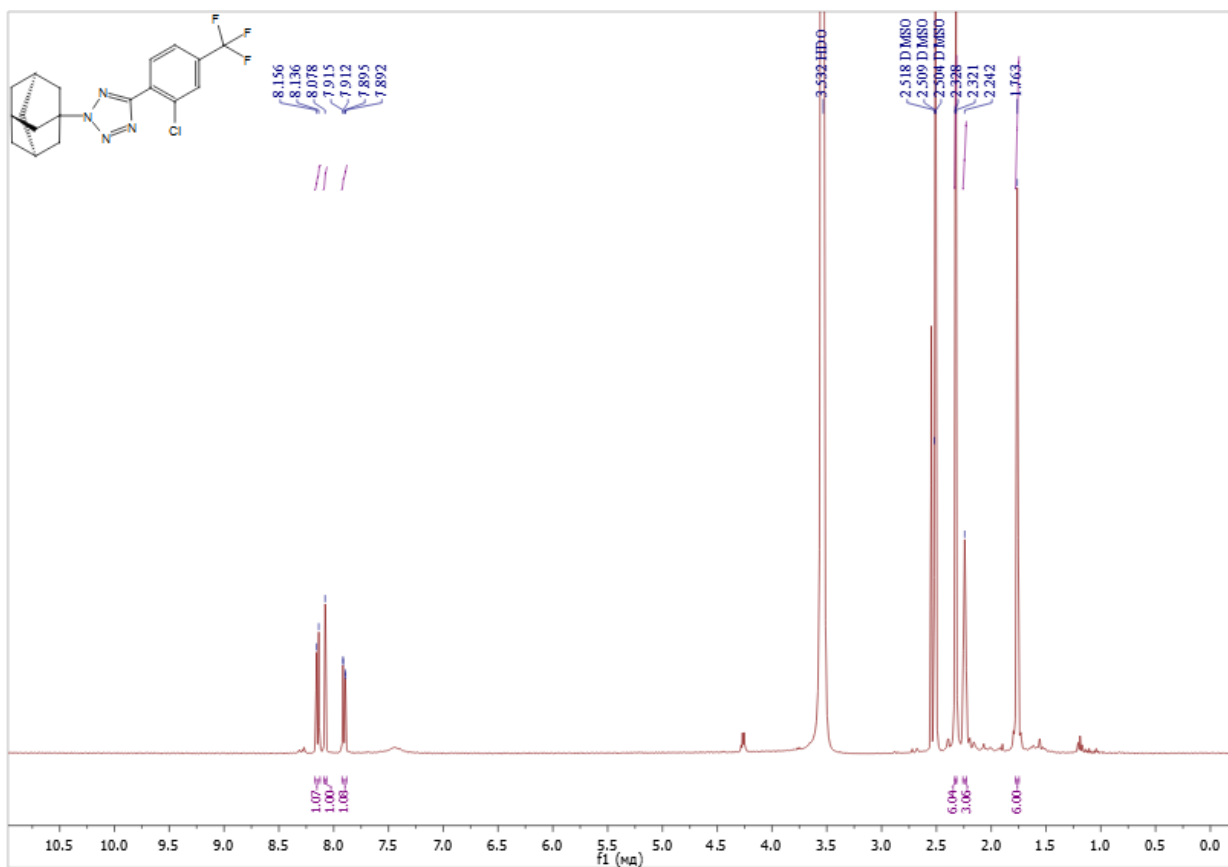

Fig. S19. <sup>1</sup>H spectra of **3f**

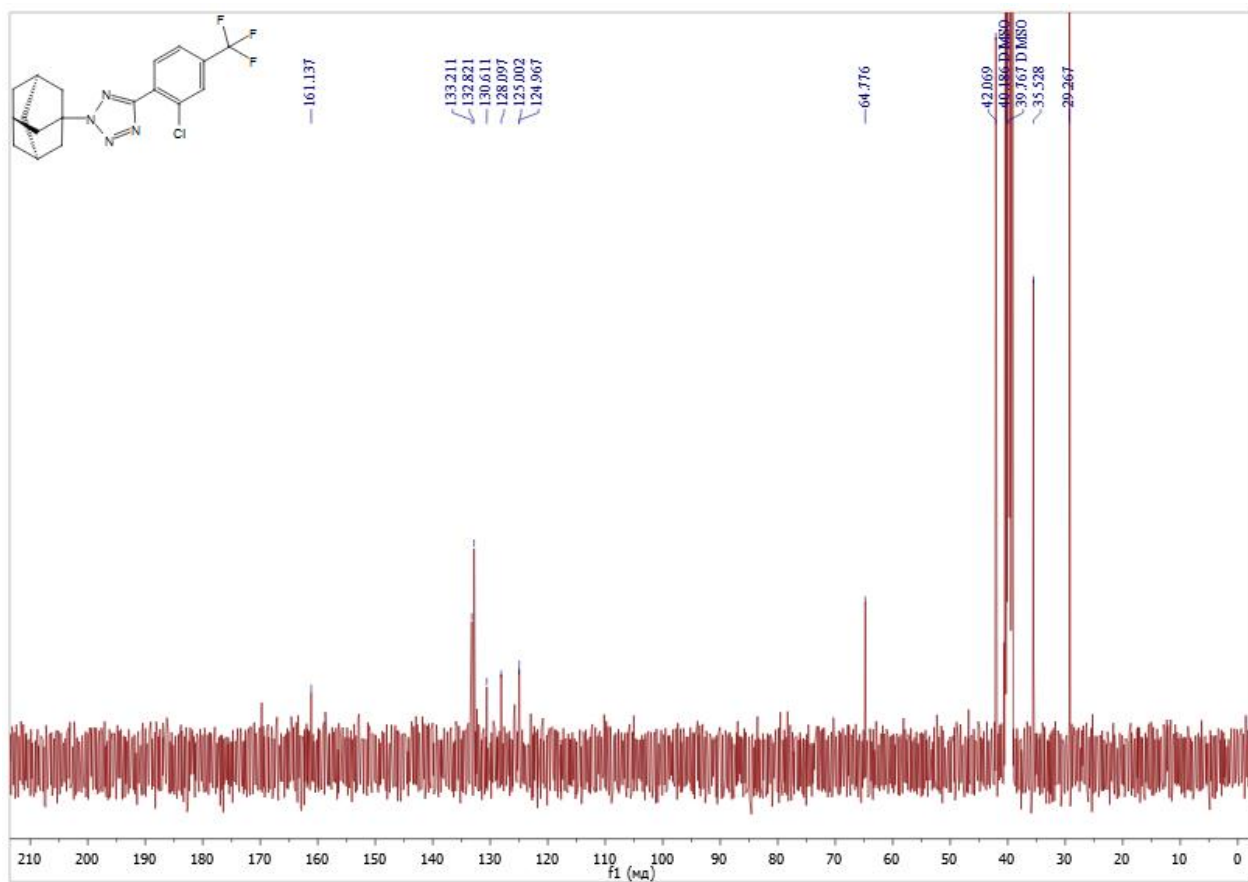

Fig. S20. <sup>13</sup>C{<sup>1</sup>H} spectra of **3f**

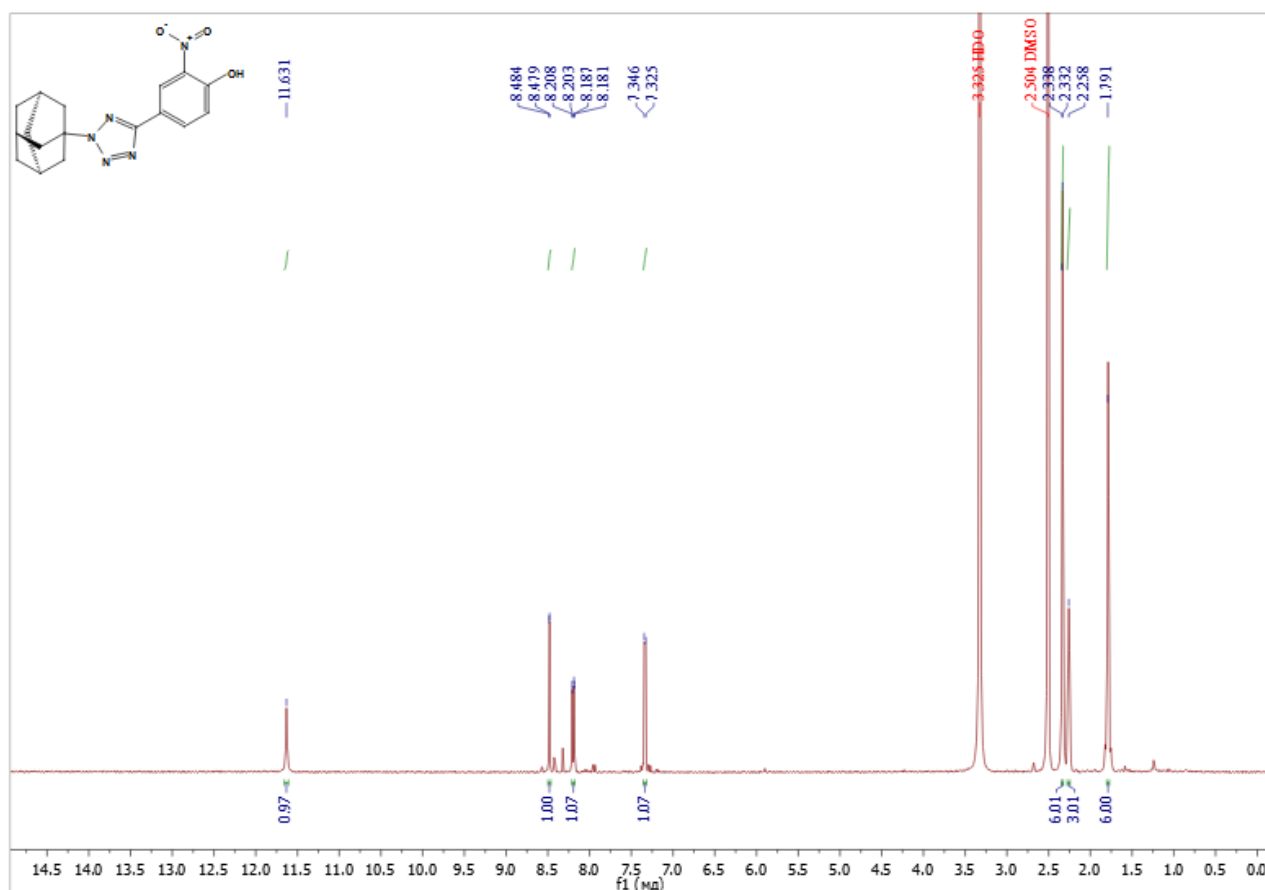

Fig. S21.  $^1\text{H}$  spectra of **3g**

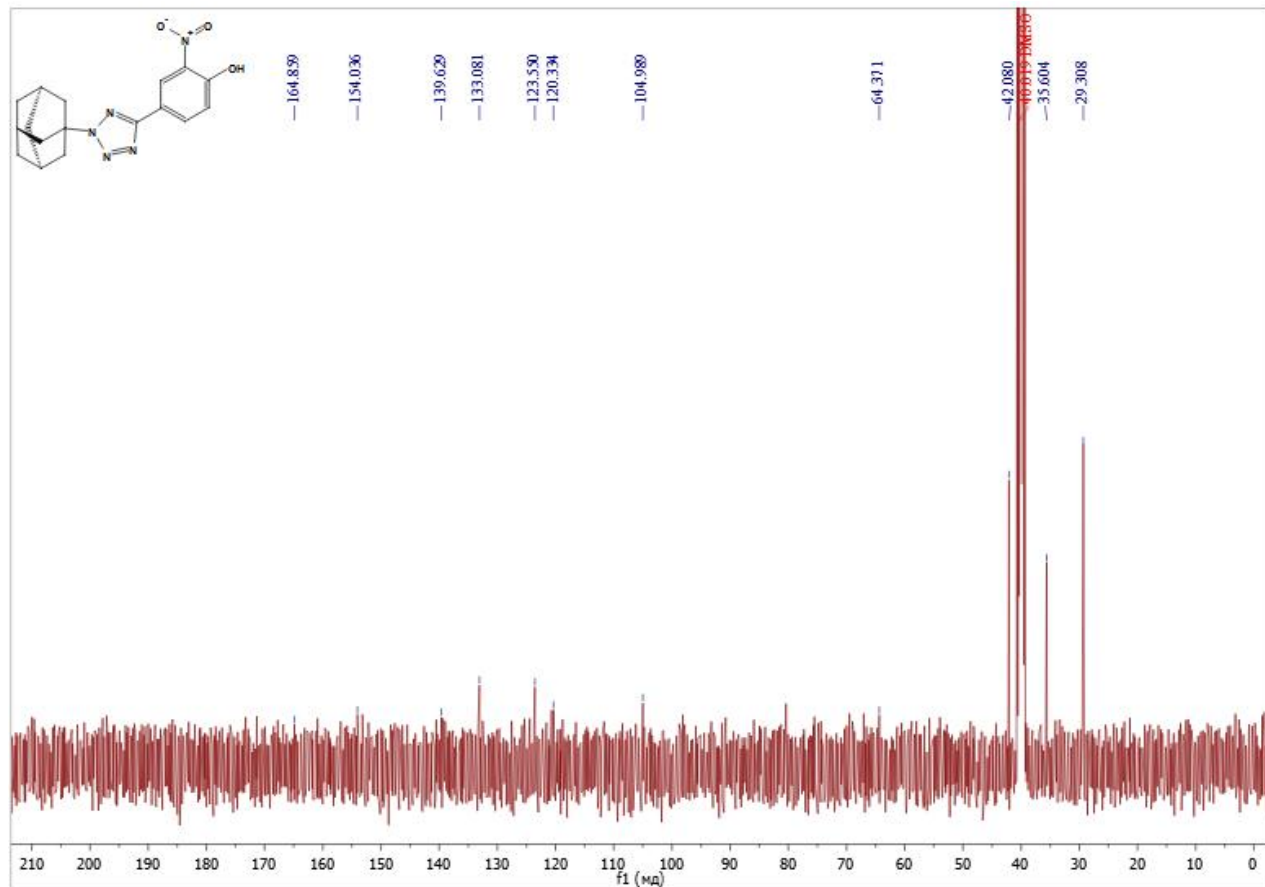

Fig. S22.  $^{13}\text{C}\{^1\text{H}\}$  spectra of **3g**

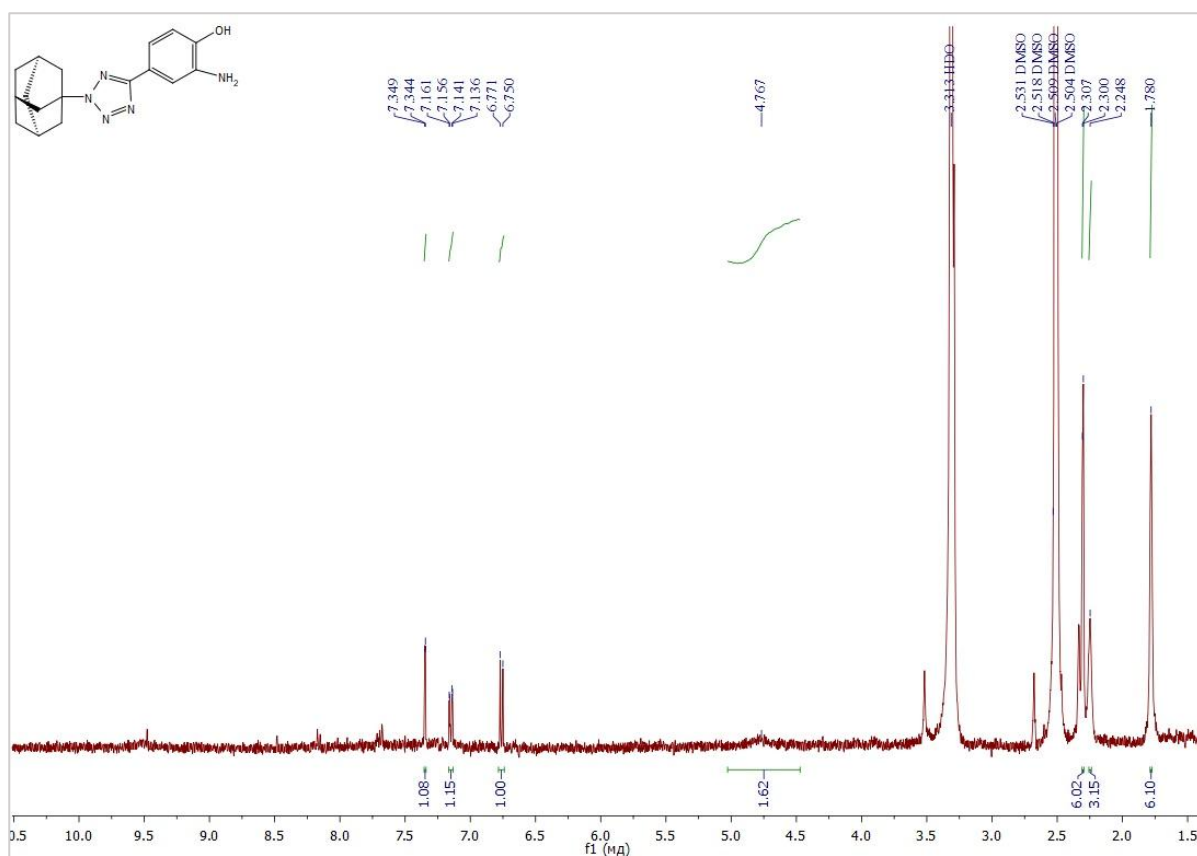

Fig. S23. <sup>1</sup>H spectra of **3h**

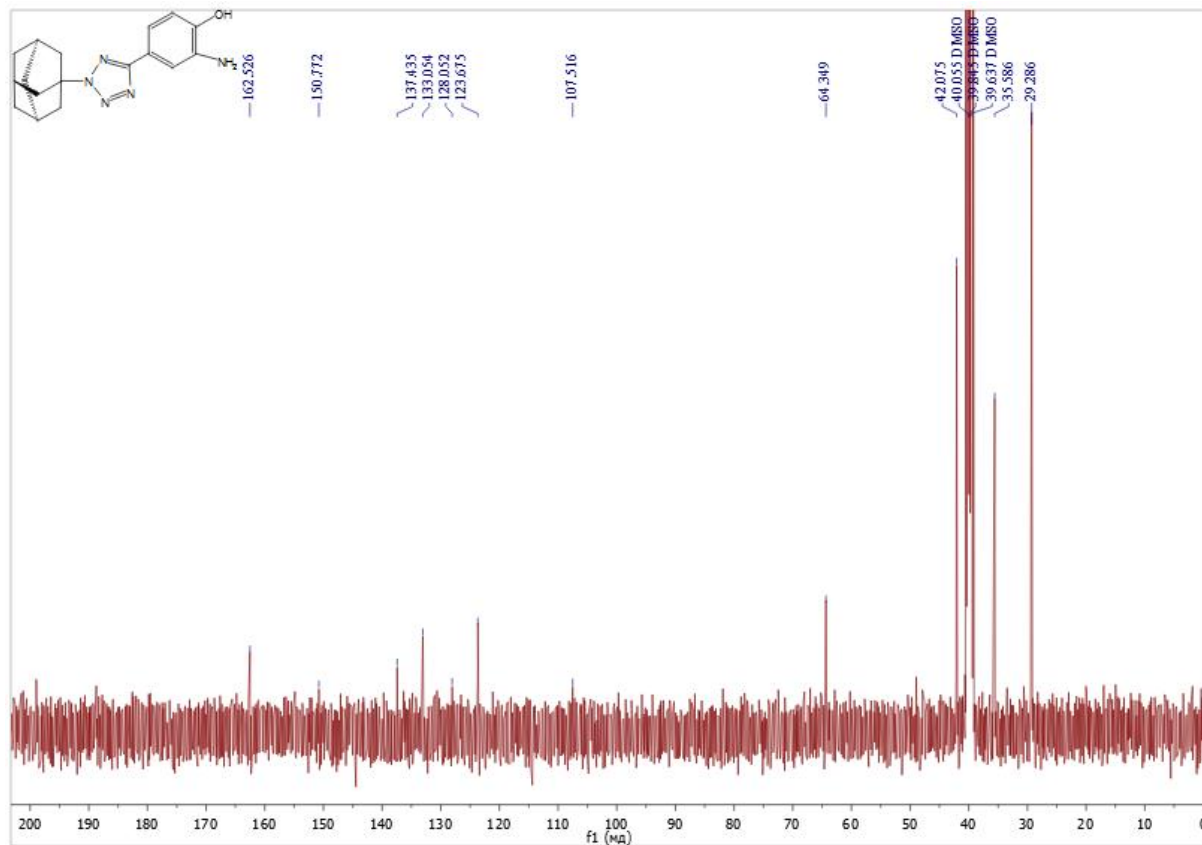

Fig. S24. <sup>13</sup>C{<sup>1</sup>H} spectra of **3h**

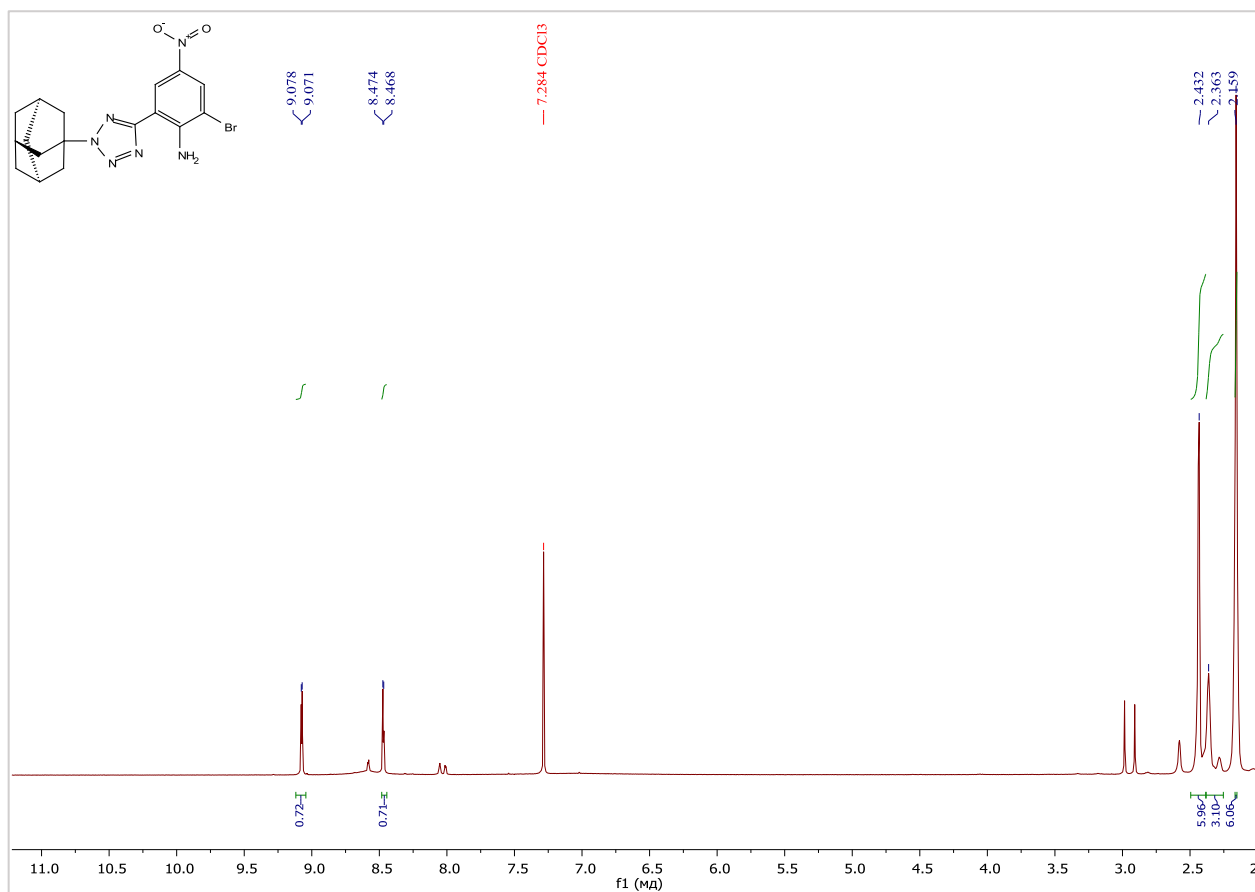

Fig. S25.  $^1\text{H}$  spectra of **3i**

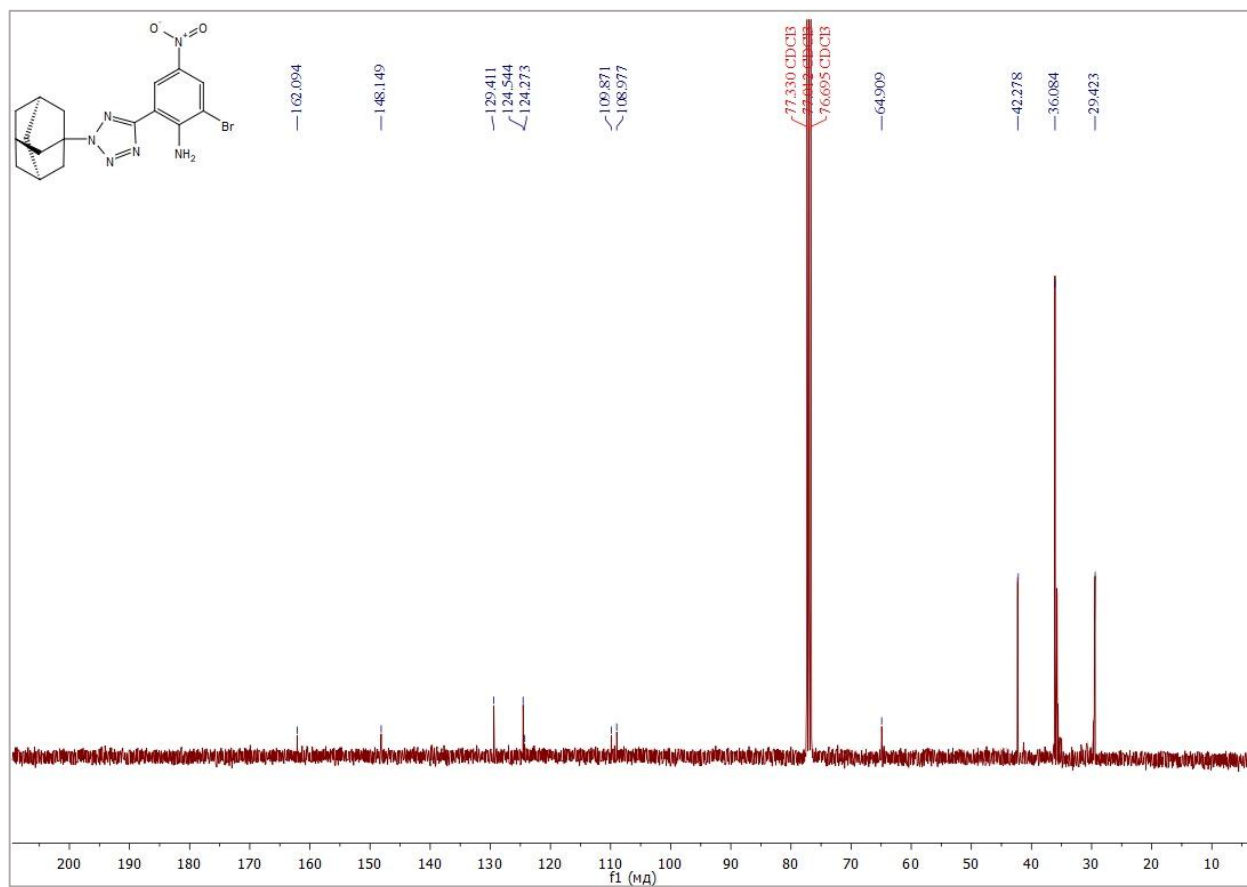

Fig. S26.  $^{13}\text{C}\{^1\text{H}\}$  spectra of **3i**

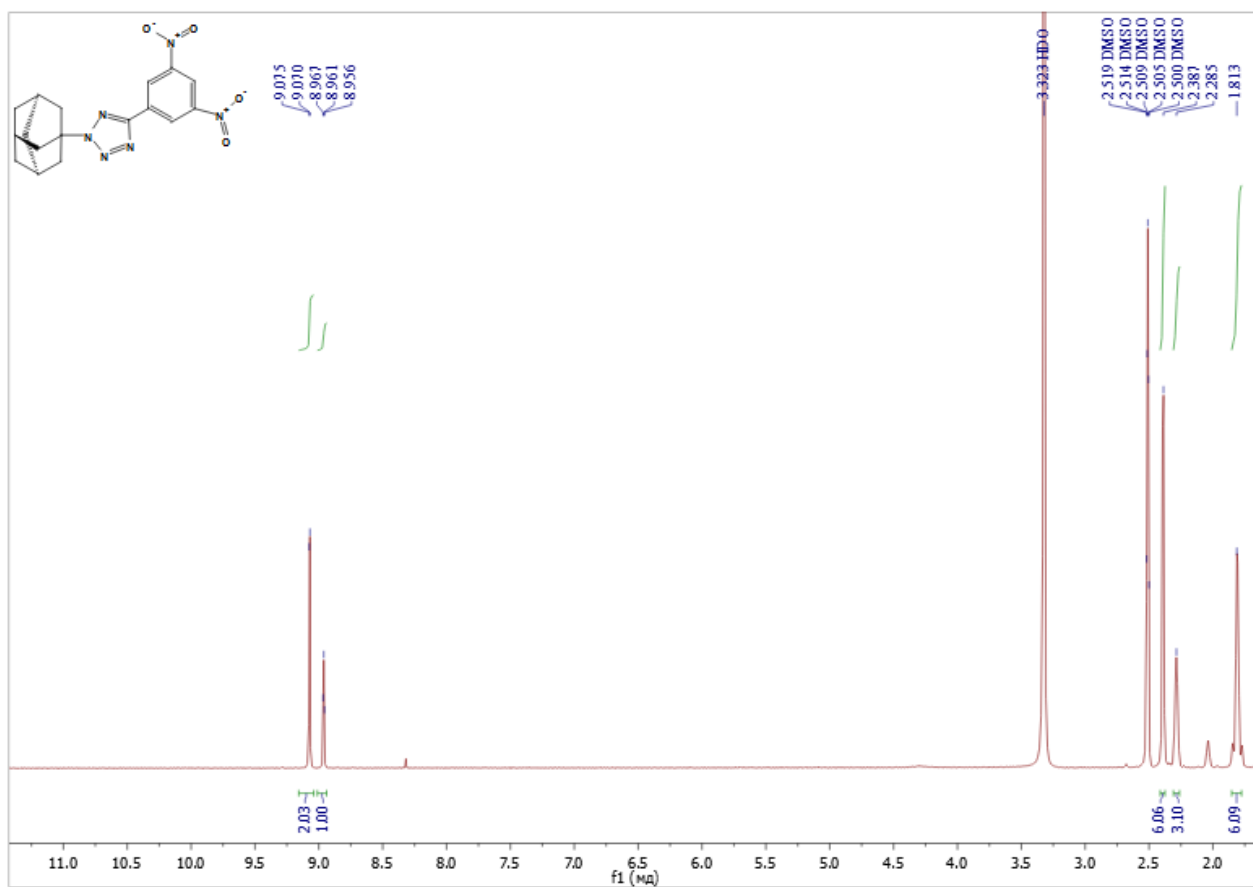

Fig. S27.  $^1\text{H}$  spectra of **3j**

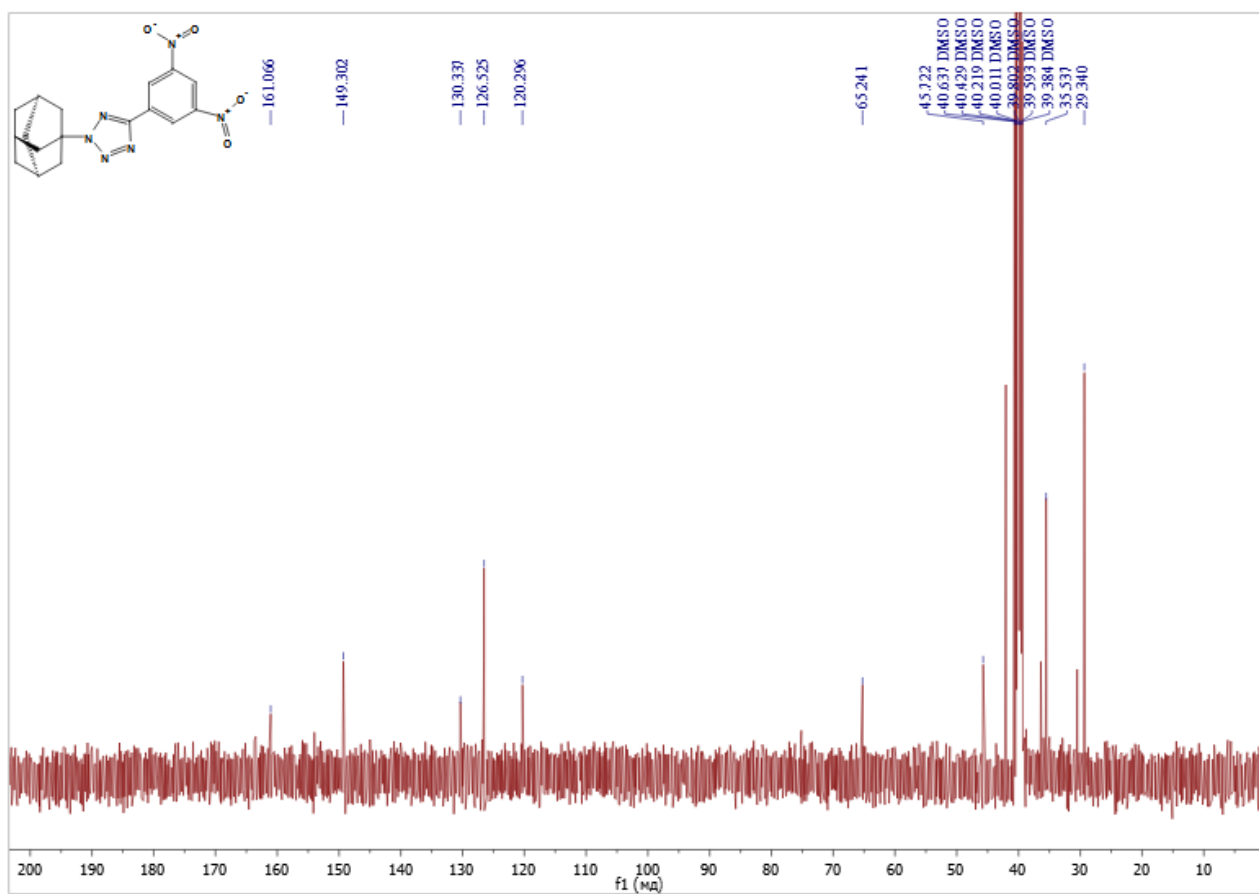

Fig. S28.  $^{13}\text{C}\{^1\text{H}\}$  spectra of **3j**

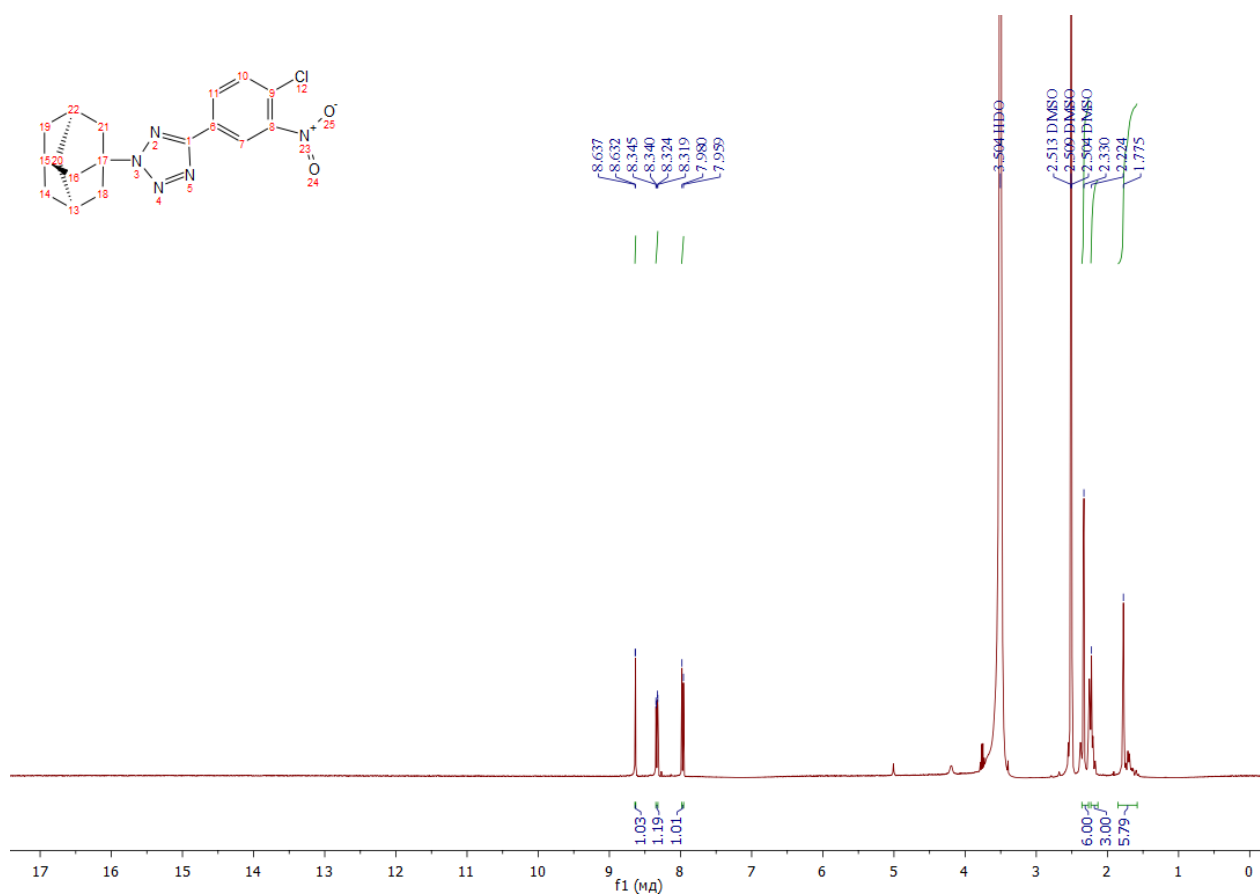

Fig. S29.  $^1\text{H}$  spectra of **3k**

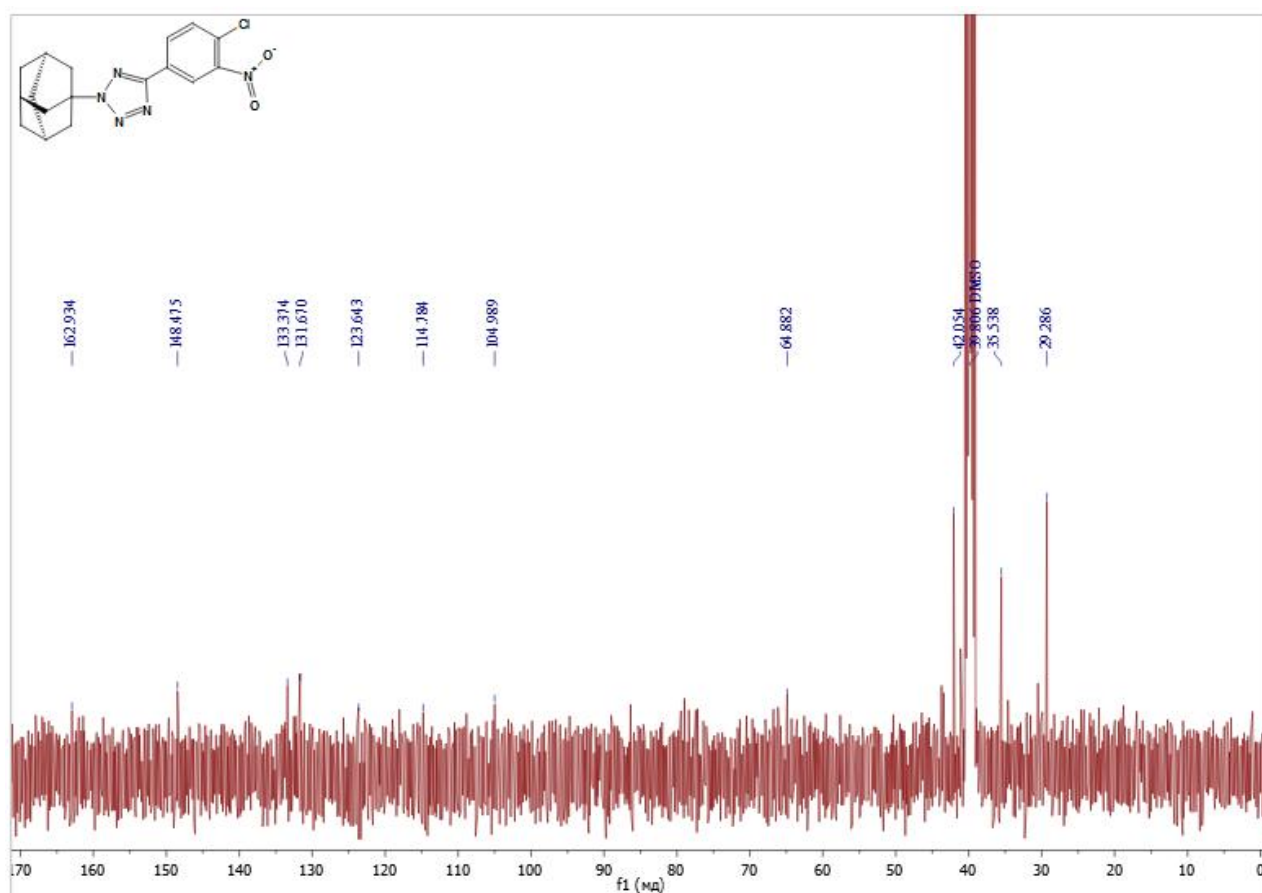

Fig. S30.  $^{13}\text{C}\{^1\text{H}\}$  spectra of **3k**



## 2. Mass spectra of compounds

### Display Report

#### Analysis Info

Analysis Name D:\Data\Work\2019\March\15\4\_000003.d  
Method tune\_low\_pos.m  
Sample Name  
Comment

Acquisition Date 18-Mar-19 11:42:47

Operator BDAL@DE  
Instrument / Ser# maXis 62

#### Acquisition Parameter

|             |          |                      |          |                  |           |
|-------------|----------|----------------------|----------|------------------|-----------|
| Source Type | ESI      | Ion Polarity         | Positive | Set Nebulizer    | 1.0 Bar   |
| Focus       | Active   |                      |          | Set Dry Heater   | 180 °C    |
| Scan Begin  | 110 m/z  | Set Capillary        | 4500 V   | Set Dry Gas      | 4.0 l/min |
| Scan End    | 1500 m/z | Set End Plate Offset | -500 V   | Set Divert Valve | Source    |

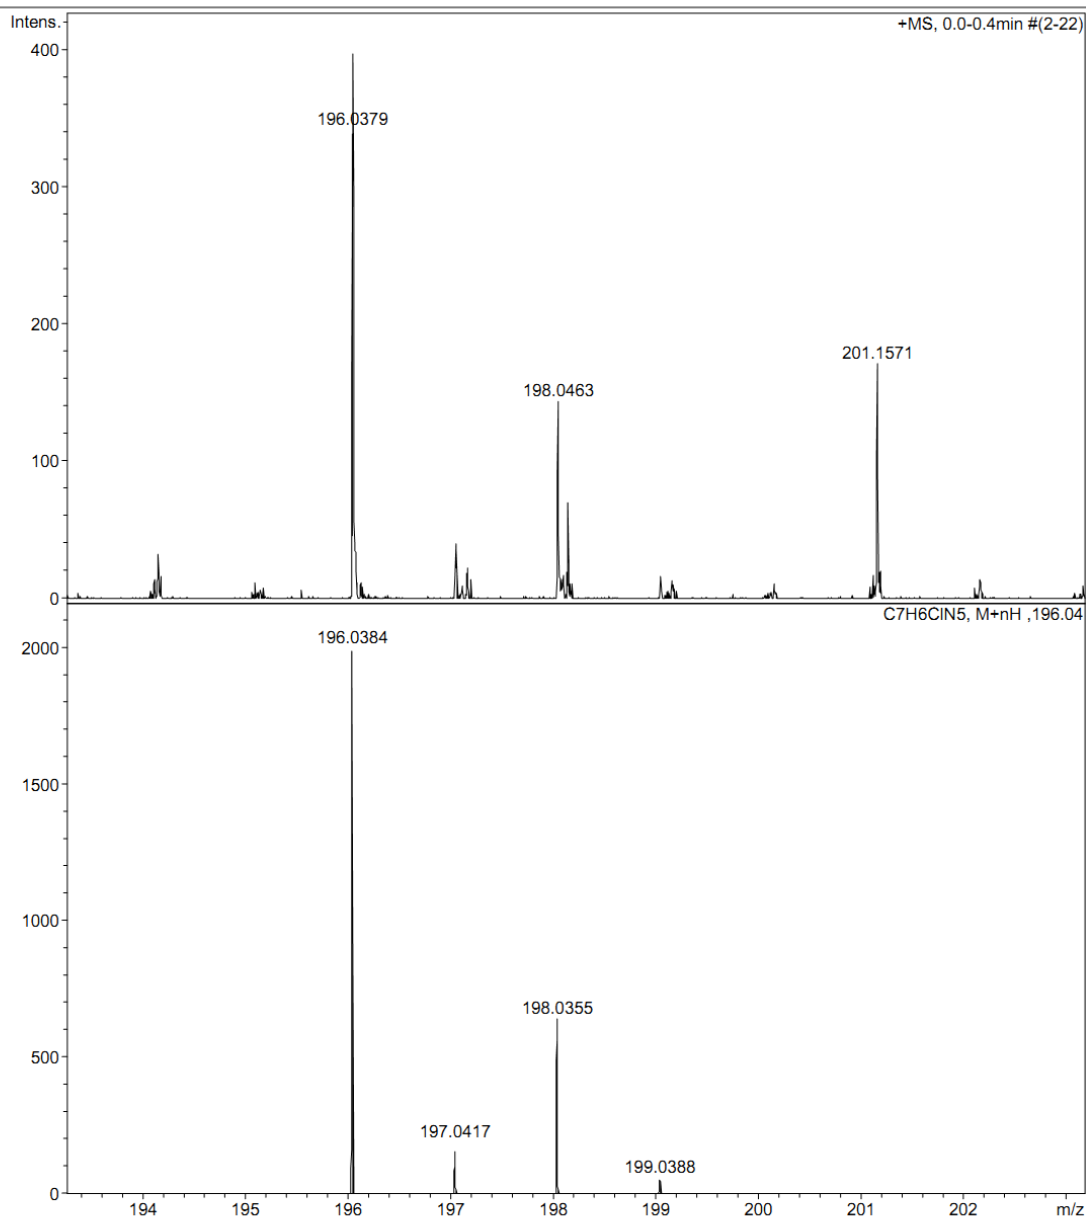

Fig. S31. Mass spectra of 2e

# Display Report

## Analysis Info

Analysis Name D:\Data\2020\december\3\BAT\_32000003.d  
Method tune\_low.m  
Sample Name  
Comment

Acquisition Date 03.12.2020 9:40:06  
Operator Bruker Customer  
Instrument / Ser# micrOTOF 10223

## Acquisition Parameter

|             |            |                      |          |                  |           |
|-------------|------------|----------------------|----------|------------------|-----------|
| Source Type | ESI        | Ion Polarity         | Positive | Set Nebulizer    | 0.4 Bar   |
| Focus       | Not active |                      |          | Set Dry Heater   | 180 °C    |
| Scan Begin  | 50 m/z     | Set Capillary        | 4500 V   | Set Dry Gas      | 4.0 l/min |
| Scan End    | 1500 m/z   | Set End Plate Offset | -500 V   | Set Divert Valve | Source    |

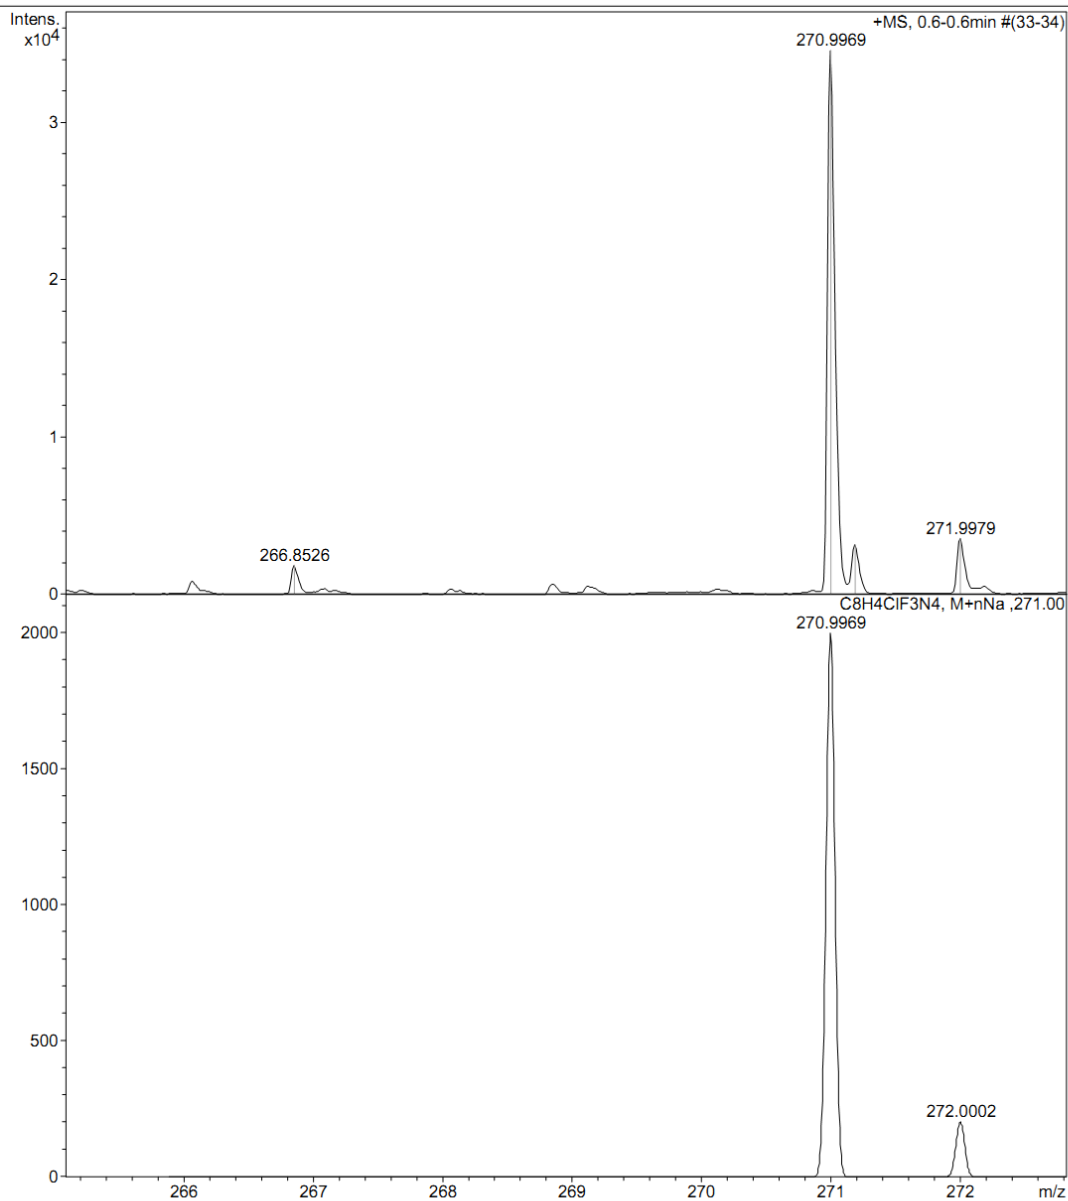

Fig. S32. Mass spectra of 2f

# Display Report

## Analysis Info

Analysis Name D:\Data\Work\2019\March\18\1\_000017.d  
Method tune\_low\_pos.m  
Sample Name  
Comment

Acquisition Date 18-Mar-19 13:28:10

Operator BDAL@DE  
Instrument / Ser# maXis 62

## Acquisition Parameter

|             |          |                      |          |                  |           |
|-------------|----------|----------------------|----------|------------------|-----------|
| Source Type | ESI      | Ion Polarity         | Negative | Set Nebulizer    | 1.0 Bar   |
| Focus       | Active   |                      |          | Set Dry Heater   | 180 °C    |
| Scan Begin  | 110 m/z  | Set Capillary        | 3500 V   | Set Dry Gas      | 4.0 l/min |
| Scan End    | 1500 m/z | Set End Plate Offset | -500 V   | Set Divert Valve | Source    |

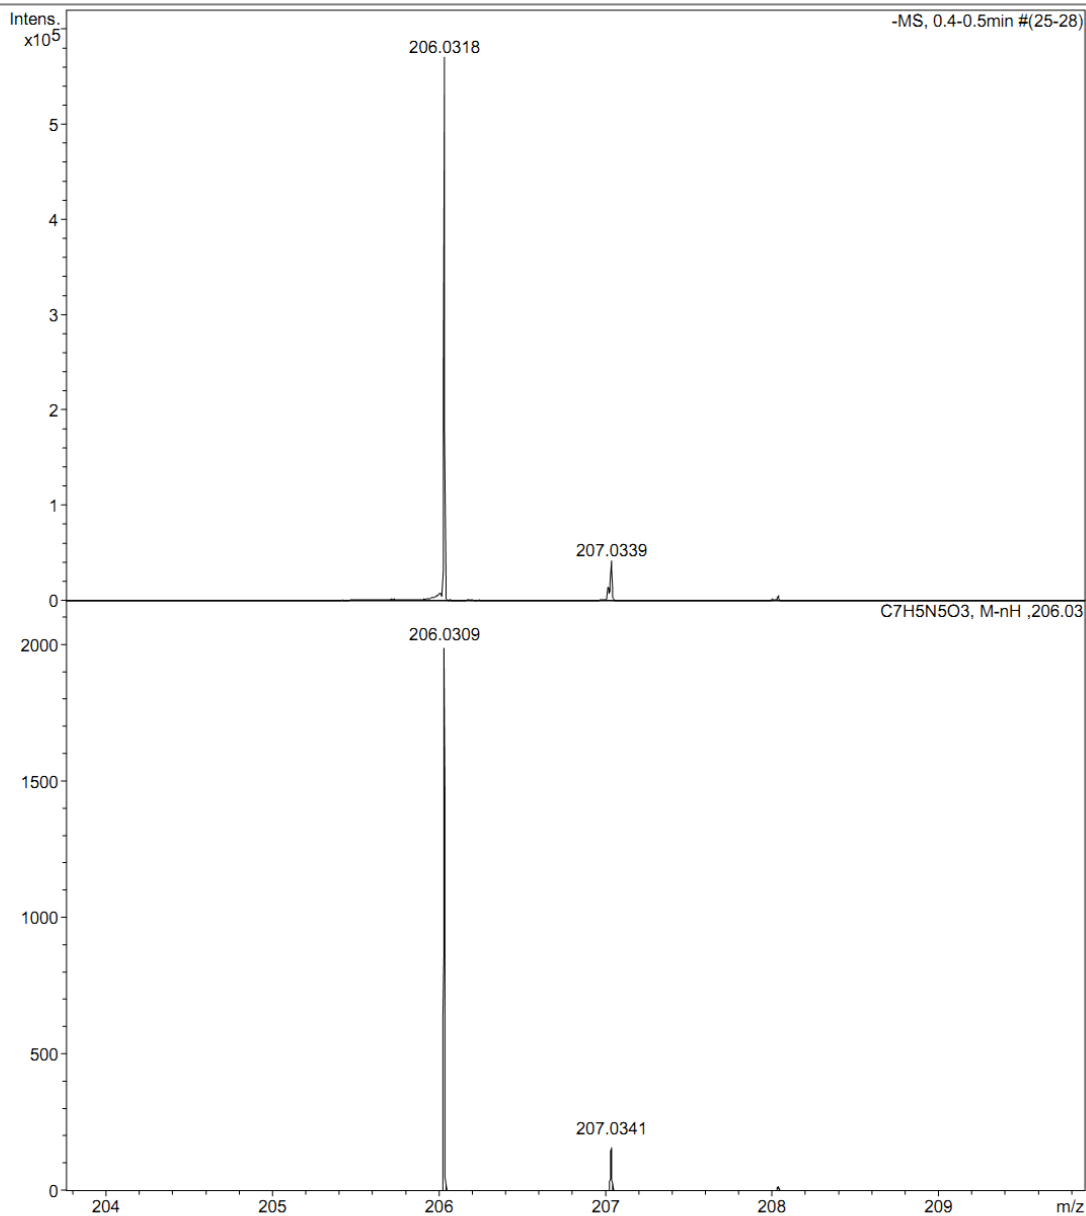

Fig. S33. Mass spectra of 2g

# Display Report

## Analysis Info

Analysis Name D:\Data\2020\december\3\BAT\_30000002.d  
Method tune\_low.m  
Sample Name  
Comment

Acquisition Date 03.12.2020 9:35:48  
Operator Bruker Customer  
Instrument / Ser# micrOTOF 10223

## Acquisition Parameter

|             |            |                      |          |                  |           |
|-------------|------------|----------------------|----------|------------------|-----------|
| Source Type | ESI        | Ion Polarity         | Positive | Set Nebulizer    | 0.4 Bar   |
| Focus       | Not active |                      |          | Set Dry Heater   | 180 °C    |
| Scan Begin  | 50 m/z     | Set Capillary        | 4500 V   | Set Dry Gas      | 4.0 l/min |
| Scan End    | 1500 m/z   | Set End Plate Offset | -500 V   | Set Divert Valve | Source    |

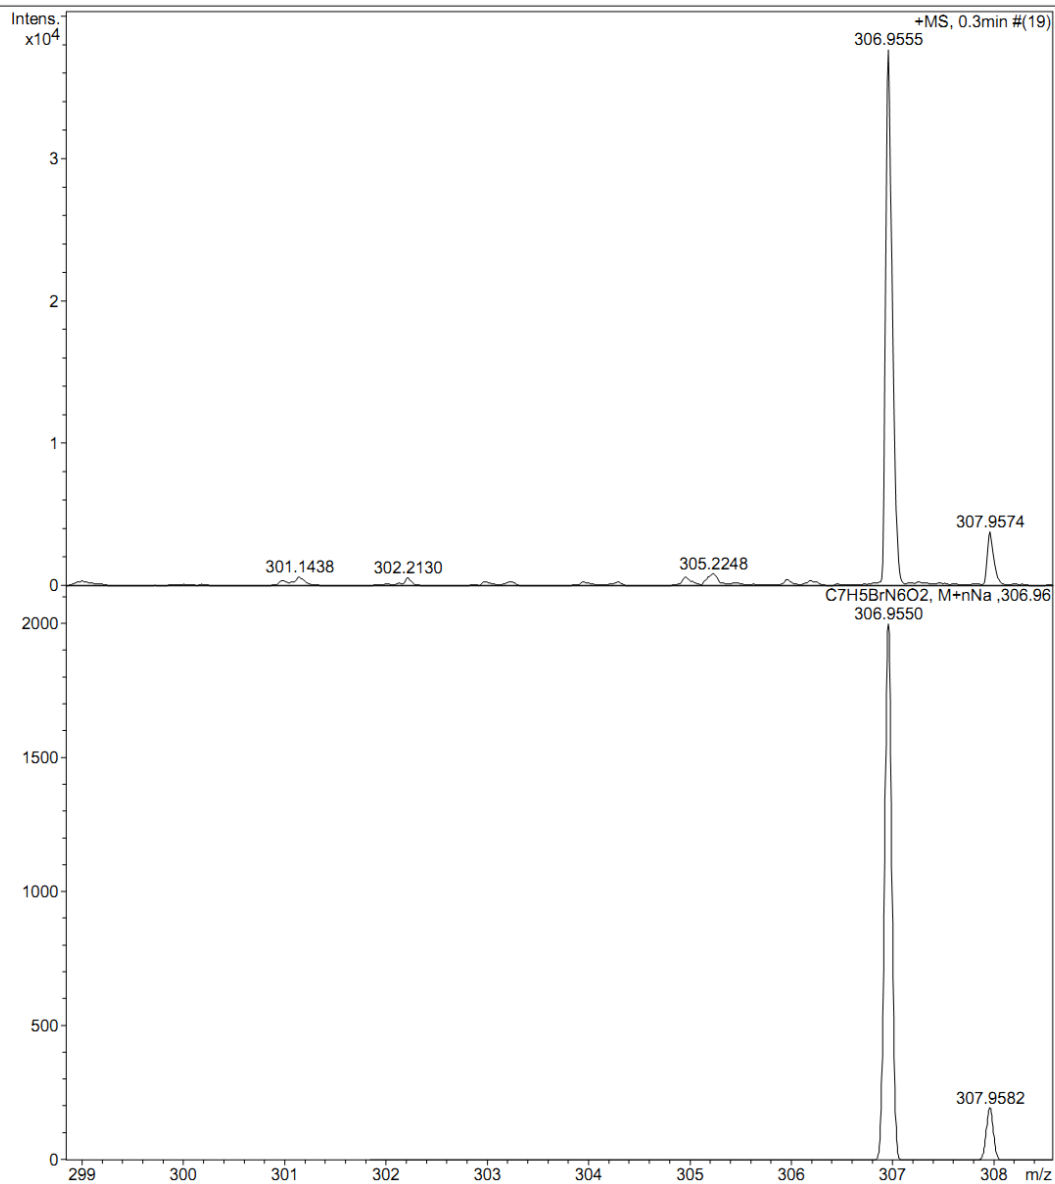

Fig. S34. Mass spectra of **2i**

# Display Report

## Analysis Info

Analysis Name D:\Data\Work\2019\November\06\1\_000007.d  
Method tune\_low.m  
Sample Name  
Comment

Acquisition Date 06-Nov-19 12:36:06

Operator BDAL@DE  
Instrument / Ser# maXis 62

## Acquisition Parameter

|             |            |                      |          |                  |           |
|-------------|------------|----------------------|----------|------------------|-----------|
| Source Type | ESI        | Ion Polarity         | Positive | Set Nebulizer    | 0.4 Bar   |
| Focus       | Not active |                      |          | Set Dry Heater   | 180 °C    |
| Scan Begin  | 50 m/z     | Set Capillary        | 3200 V   | Set Dry Gas      | 4.0 l/min |
| Scan End    | 3000 m/z   | Set End Plate Offset | -500 V   | Set Divert Valve | Source    |

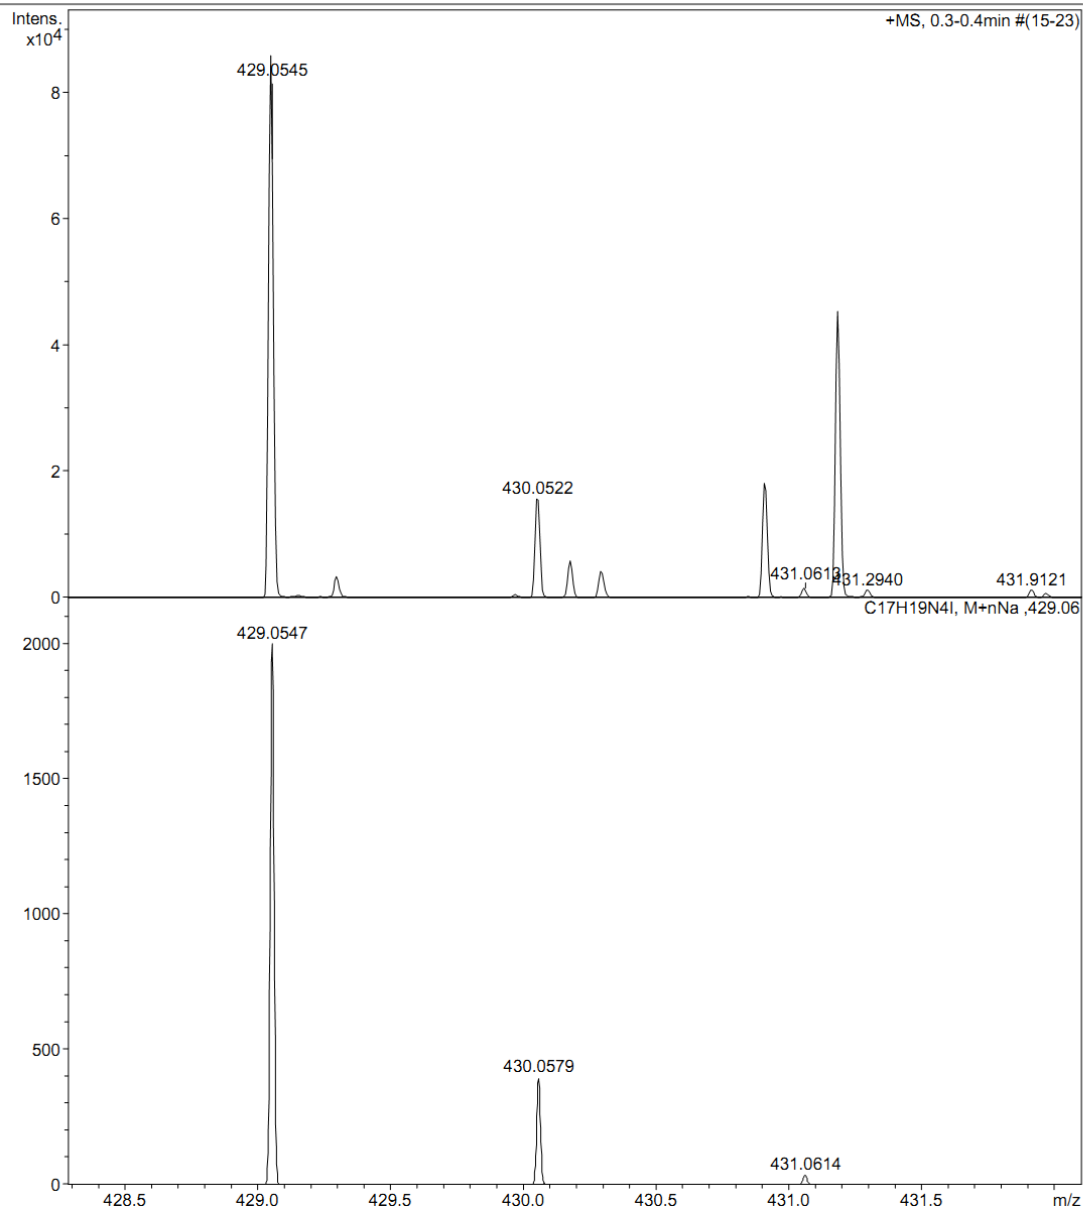

Fig. S35. Mass spectra of 3a

## Display Report

### Analysis Info

Analysis Name D:\Data\Work\2019\September\25\1\_d  
Method tune\_low\_pos\_07neb.m  
Sample Name  
Comment

Acquisition Date 25-Sep-19 10:07:28  
Operator BDAL@DE  
Instrument / Ser# maXis 62

### Acquisition Parameter

|             |          |                      |          |                  |           |
|-------------|----------|----------------------|----------|------------------|-----------|
| Source Type | ESI      | Ion Polarity         | Positive | Set Nebulizer    | 0.7 Bar   |
| Focus       | Active   |                      |          | Set Dry Heater   | 180 °C    |
| Scan Begin  | 100 m/z  | Set Capillary        | 4500 V   | Set Dry Gas      | 4.0 l/min |
| Scan End    | 2100 m/z | Set End Plate Offset | -500 V   | Set Divert Valve | Source    |

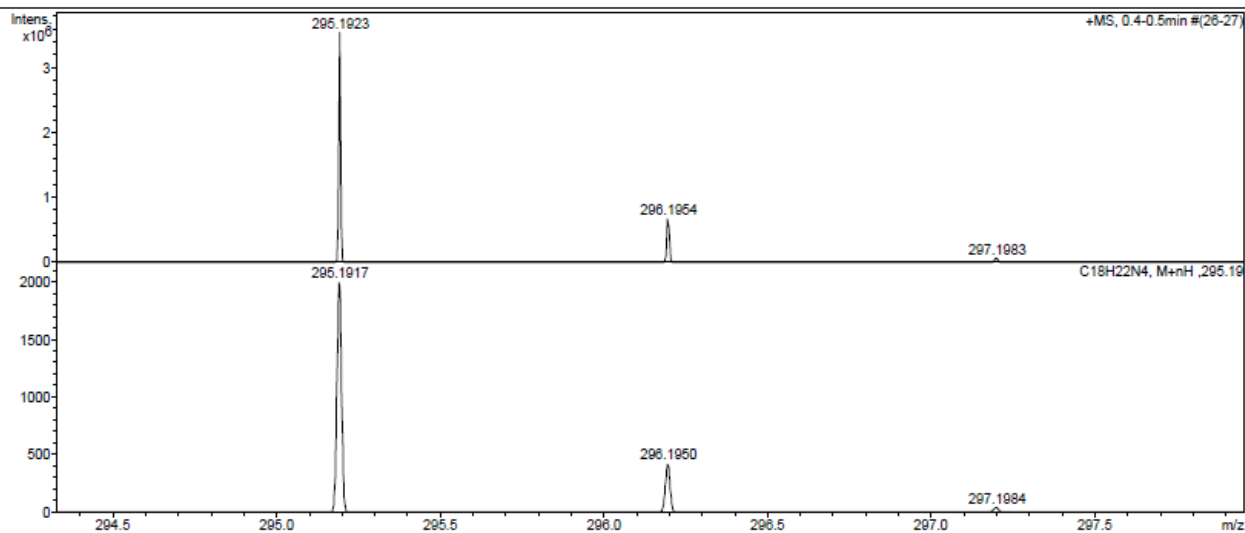

Fig. S36. Mass spectra of **3b**

## Mass Spectrum Report

**Analysis Info**  
Analysis Name D:\Data\Data\2019\may\13\2\DS\_10\_000002.d  
Method tune\_low.m  
Sample Name  
Comment

Acquisition Date 14.05.2019 15:41:28  
Operator Bruker Customer  
Instrument / Ser# microTOF 10223

| Acquisition Parameter |            |                      |          |                  |           |
|-----------------------|------------|----------------------|----------|------------------|-----------|
| Source Type           | ESI        | Ion Polarity         | Positive | Set Nebulizer    | 1.0 Bar   |
| Focus                 | Not active |                      |          | Set Dry Heater   | 180 °C    |
| Scan Begin            | 50 m/z     | Set Capillary        | 4500 V   | Set Dry Gas      | 8.0 l/min |
| Scan End              | 3000 m/z   | Set End Plate Offset | -500 V   | Set Divert Valve | Source    |

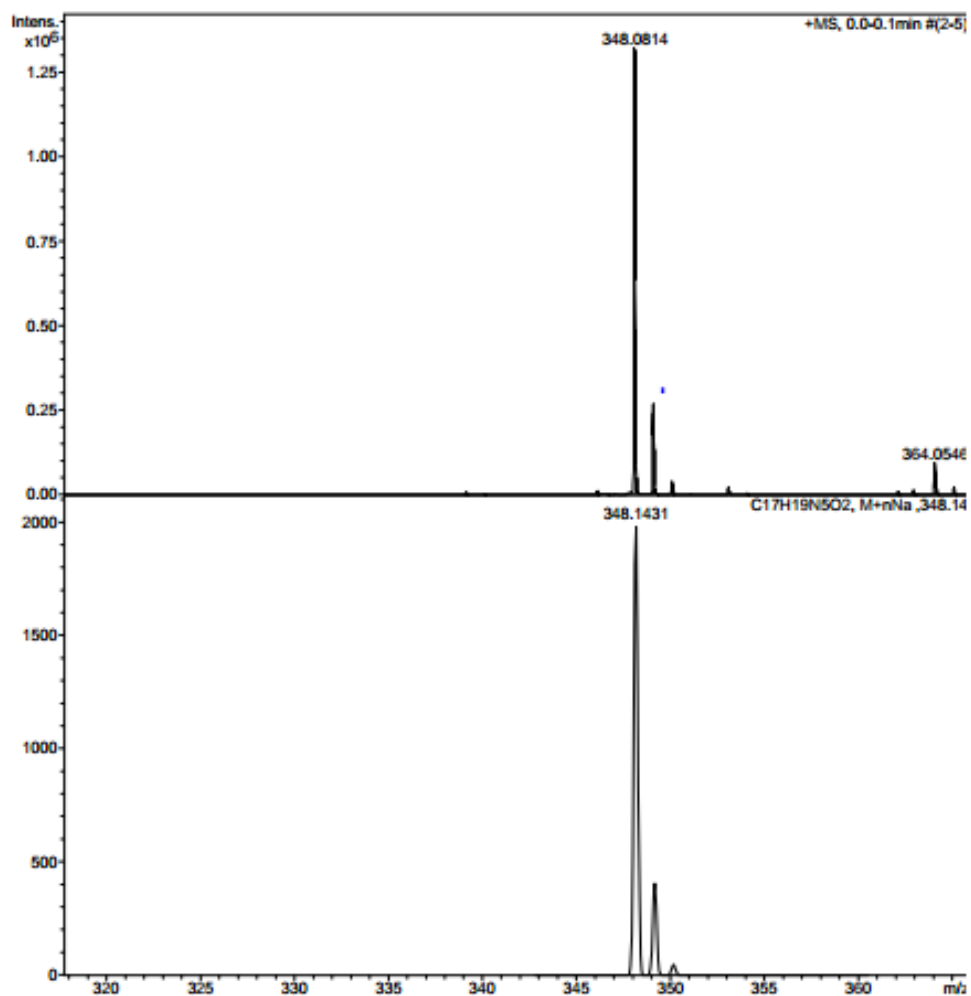

Fig. S37. Mass spectra of **3c**

## Display Report

### Analysis Info

Analysis Name D:\Data\Work\2020\November\01\2\_000010.d  
Method tune\_low\_pos\_07neb.m  
Sample Name  
Comment

Acquisition Date 02-Nov-20 14:34:03

Operator BDAL@DE  
Instrument / Ser# maXis 62

### Acquisition Parameter

|             |          |                      |          |                  |           |
|-------------|----------|----------------------|----------|------------------|-----------|
| Source Type | ESI      | Ion Polarity         | Positive | Set Nebulizer    | 0.7 Bar   |
| Focus       | Active   |                      |          | Set Dry Heater   | 180 °C    |
| Scan Begin  | 100 m/z  | Set Capillary        | 4500 V   | Set Dry Gas      | 4.0 l/min |
| Scan End    | 1100 m/z | Set End Plate Offset | -500 V   | Set Divert Valve | Source    |

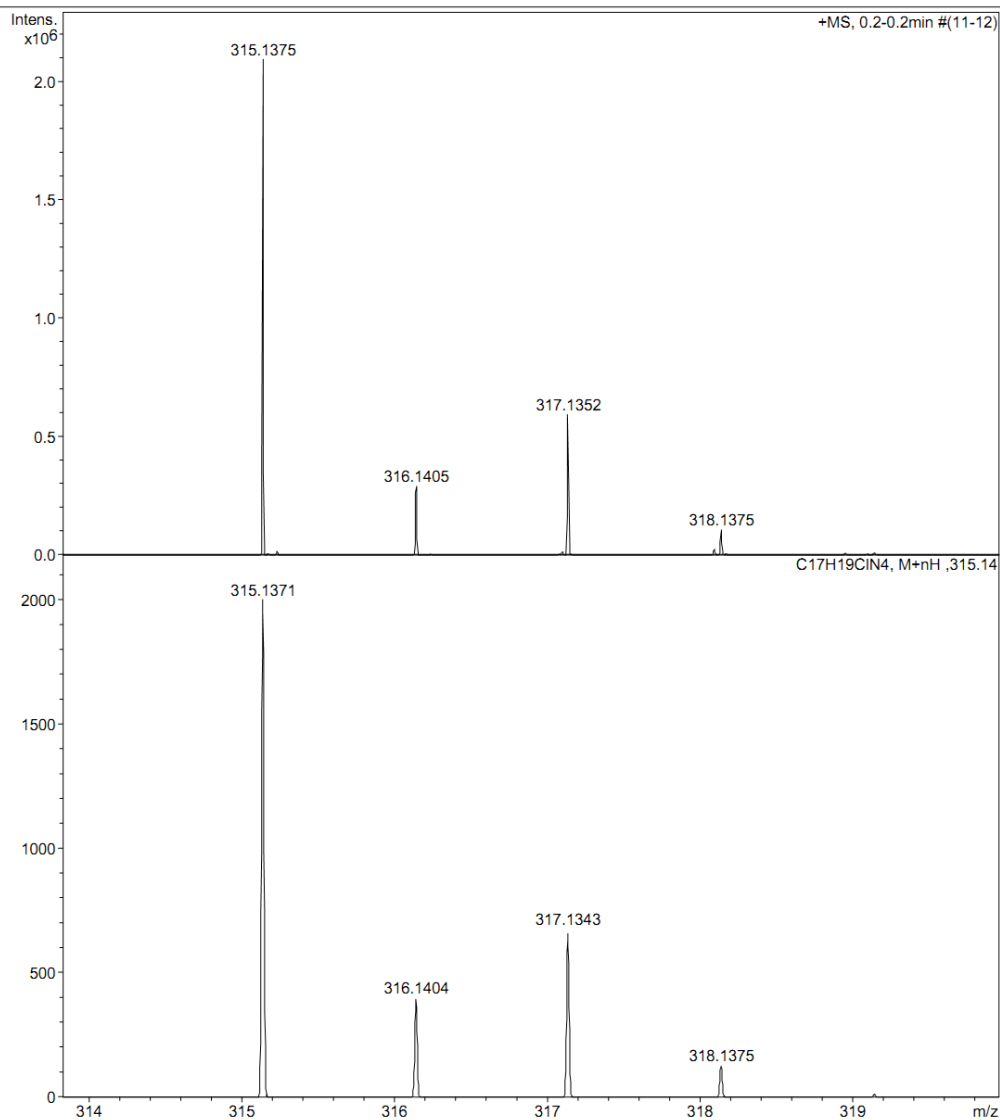

Fig. S38. Mass spectra of **3d**



## Mass Spectrum Report

### Analysis Info

Analysis Name D:\Data\Data\2019\april\16\2\A\_2\_000001.d  
Method tune\_low.m  
Sample Name  
Comment MeOH

Acquisition Date 17.04.2019 16:29:45  
Operator Bruker Customer  
Instrument / Ser# micrOTOF 10223

### Acquisition Parameter

|             |            |                      |          |                  |           |
|-------------|------------|----------------------|----------|------------------|-----------|
| Source Type | ESI        | Ion Polarity         | Positive | Set Nebulizer    | 0.4 Bar   |
| Focus       | Not active |                      |          | Set Dry Heater   | 180 °C    |
| Scan Begin  | 50 m/z     | Set Capillary        | 4500 V   | Set Dry Gas      | 4.0 l/min |
| Scan End    | 3000 m/z   | Set End Plate Offset | -500 V   | Set Divert Valve | Source    |

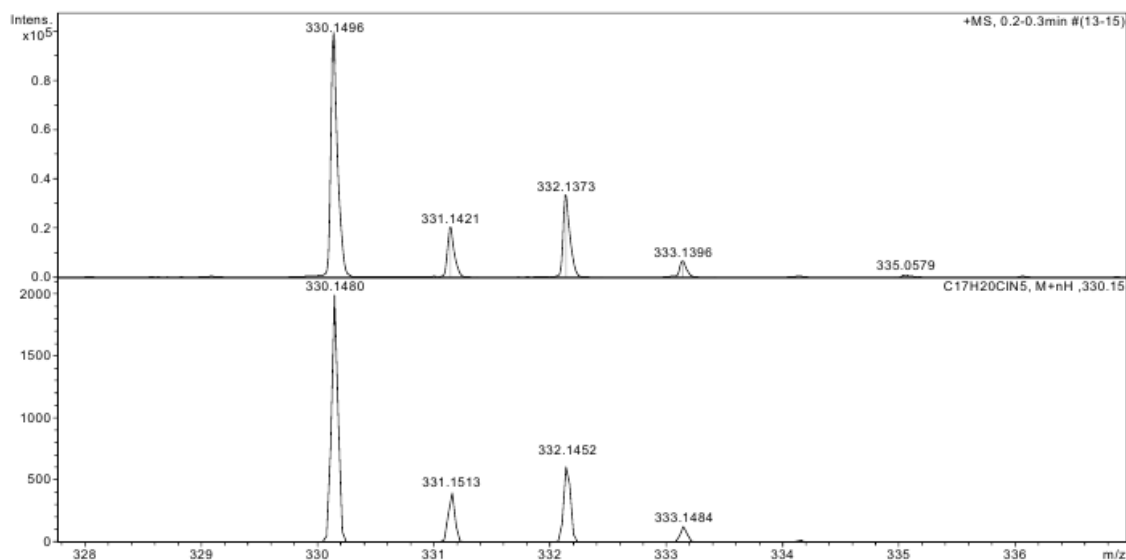

Bruker Compass DataAnalysis 4.0

printed: 17.04.2019 16:34:47

Page 1 of 1

Fig. S39. Mass spectra of 3e

## Display Report

### Analysis Info

Analysis Name D:\Data\Work\2019\October\11\1\_000002.d  
Method tune\_low.m  
Sample Name  
Comment

Acquisition Date 11-Oct-19 12:15:55  
Operator BDAL@DE  
Instrument / Ser# maXis 62

### Acquisition Parameter

|             |            |                      |          |                  |           |
|-------------|------------|----------------------|----------|------------------|-----------|
| Source Type | ESI        | Ion Polarity         | Positive | Set Nebulizer    | 1.0 Bar   |
| Focus       | Not active |                      |          | Set Dry Heater   | 180 °C    |
| Scan Begin  | 50 m/z     | Set Capillary        | 3200 V   | Set Dry Gas      | 4.0 l/min |
| Scan End    | 3000 m/z   | Set End Plate Offset | -500 V   | Set Divert Valve | Source    |

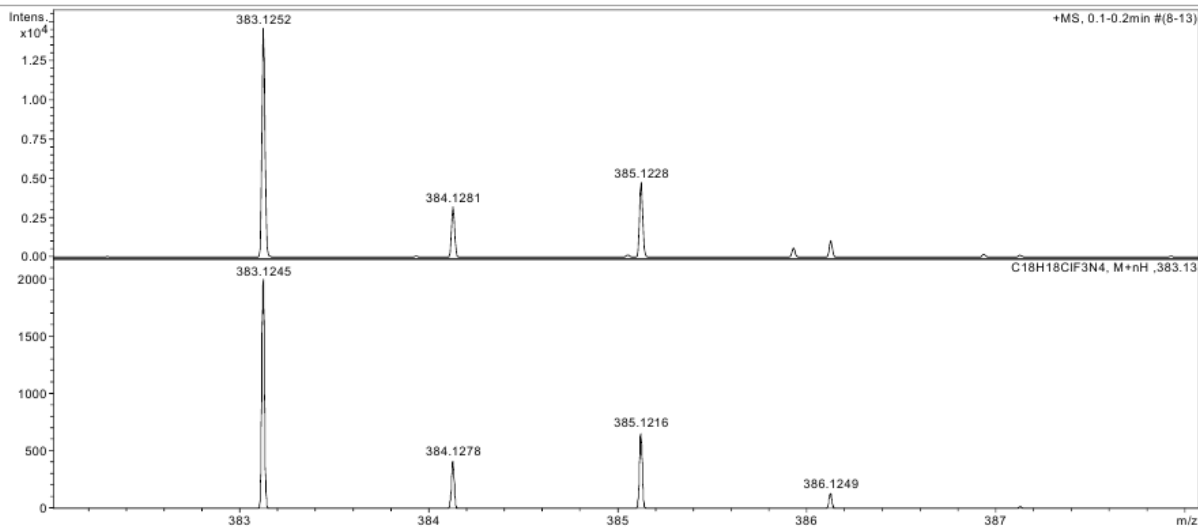

Bruker Compass DataAnalysis 4.0

printed: 11-Oct-19 12:17:06

Page 1 of 1

Fig. S40. Mass spectra of 3f

## Mass Spectrum Report

**Analysis Info**  
Analysis Name: D:\Data\Data\2019\april\16\2\A\_\_000002.d  
Method: tune\_low.m  
Sample Name: MeOH  
Comment: MeOH  
Acquisition Date: 17.04.2019 12:52:50  
Operator: Bruker Customer  
Instrument / Ser#: micrOTOF 10223

**Acquisition Parameter**  
Source Type: ESI  
Focus: Not active  
Scan Begin: 50 m/z  
Scan End: 3000 m/z  
Ion Polarity: Negative  
Set Capillary: 3500 V  
Set End Plate Offset: -500 V  
Set Nebulizer: 0.4 Bar  
Set Dry Heater: 180 °C  
Set Dry Gas: 4.0 l/min  
Set Divert Valve: Source

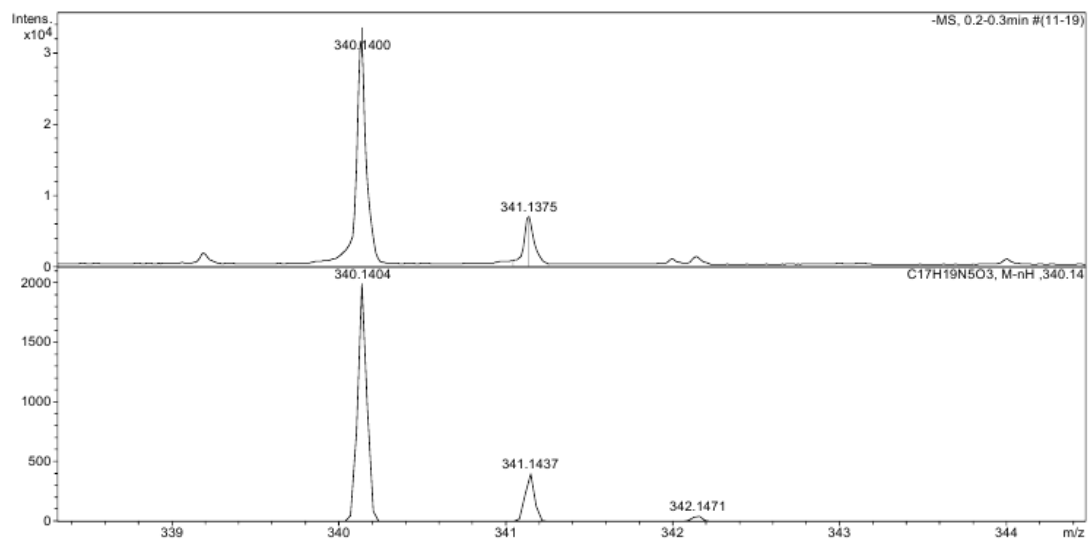

Bruker Compass DataAnalysis 4.0

printed: 17.04.2019 12:54:59

Page 1 of 1

Fig. S41. Mass spectra of **3g**

## Mass Spectrum Report

**Analysis Info**  
Analysis Name: D:\Data\Data\2019\may\28\DSV16Ad.d  
Method: tune\_low.m  
Sample Name: DSV16Ad  
Comment: MeOH  
Acquisition Date: 28.05.2019 12:33:44  
Operator: Bruker Customer  
Instrument / Ser#: micrOTOF 10223

**Acquisition Parameter**  
Source Type: ESI  
Focus: Not active  
Scan Begin: 50 m/z  
Scan End: 3000 m/z  
Ion Polarity: Positive  
Set Capillary: 4500 V  
Set End Plate Offset: -500 V  
Set Nebulizer: 1.0 Bar  
Set Dry Heater: 180 °C  
Set Dry Gas: 8.0 l/min  
Set Divert Valve: Source

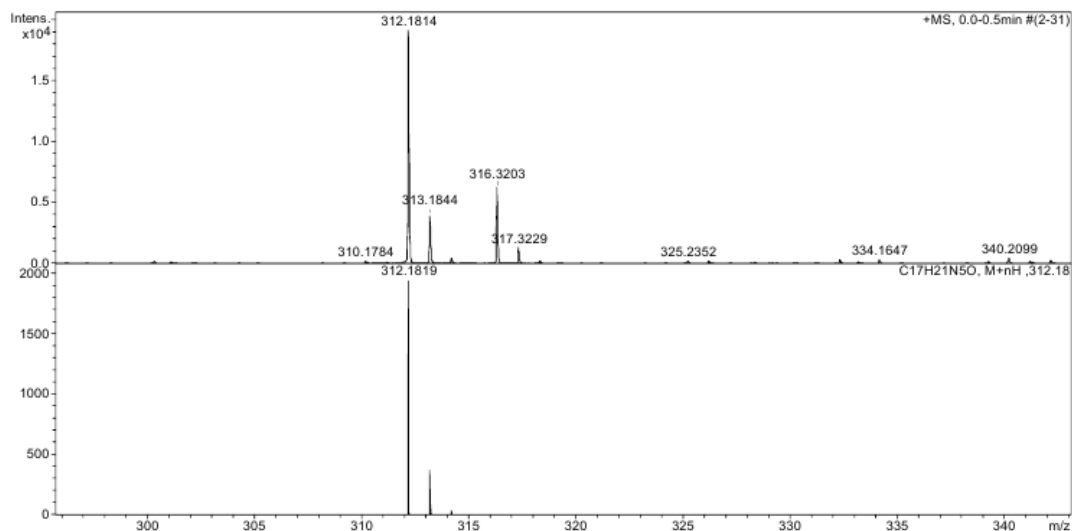

Bruker Compass DataAnalysis 4.0

printed: 28.05.2019 12:38:03

Page 1 of 1

Fig. S42. Mass spectra of **3h**

## Display Report

**Analysis Info**

Analysis Name D:\Data\Work\2019\September\25\1\_000001.d  
 Method tune\_low\_pos\_07.neb.m  
 Sample Name  
 Comment

Acquisition Date 25-Sep-19 10:10:02  
 Operator BDAL@DE  
 Instrument / Ser# maXis 62

**Acquisition Parameter**

|             |          |                      |          |                  |           |
|-------------|----------|----------------------|----------|------------------|-----------|
| Source Type | ESI      | Ion Polarity         | Negative | Set Nebulizer    | 0.7 Bar   |
| Focus       | Active   |                      |          | Set Dry Heater   | 180 °C    |
| Scan Begin  | 100 m/z  | Set Capillary        | 3500 V   | Set Dry Gas      | 4.0 l/min |
| Scan End    | 2100 m/z | Set End Plate Offset | -500 V   | Set Divert Valve | Source    |

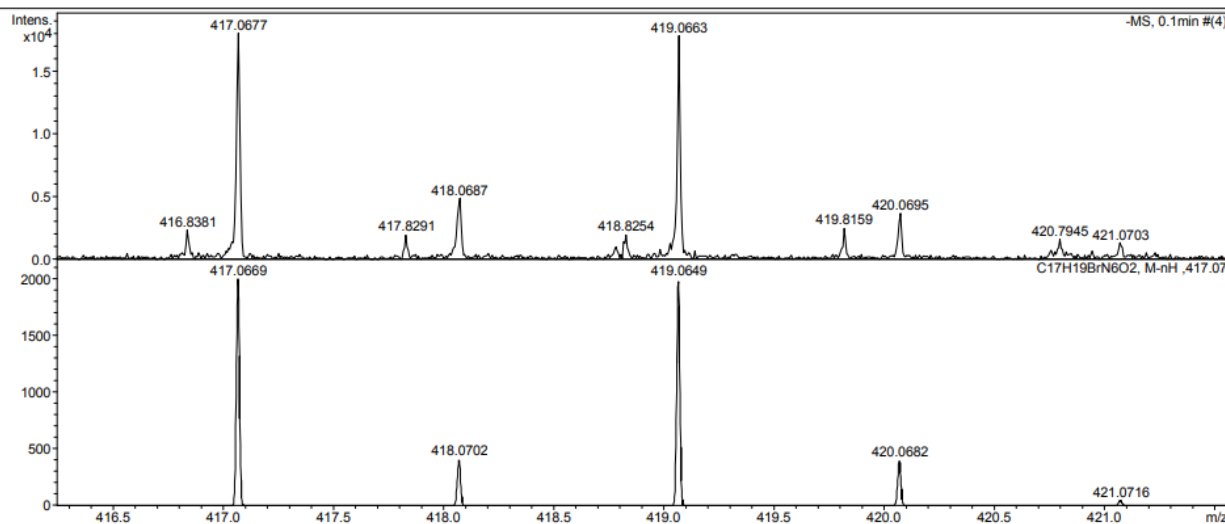

Bruker Compass DataAnalysis 4.0

printed: 25-Sep-19 10:11:29

Page 1 of 1

Fig. S43. Mass spectra of **3i**

## Display Report

**Analysis Info**

Analysis Name D:\Data\Data\2019\april\10\2\1000001.d  
 Method tune\_low.m  
 Sample Name ABB420  
 Comment

Acquisition Date 11.04.2019 9:39:39  
 Operator Bruker Customer  
 Instrument / Ser# micrOTOF 10223

**Acquisition Parameter**

|             |            |                      |          |                  |           |
|-------------|------------|----------------------|----------|------------------|-----------|
| Source Type | ESI        | Ion Polarity         | Positive | Set Nebulizer    | 0.4 Bar   |
| Focus       | Not active |                      |          | Set Dry Heater   | 180 °C    |
| Scan Begin  | 50 m/z     | Set Capillary        | 4500 V   | Set Dry Gas      | 4.0 l/min |
| Scan End    | 3000 m/z   | Set End Plate Offset | -500 V   | Set Divert Valve | Source    |

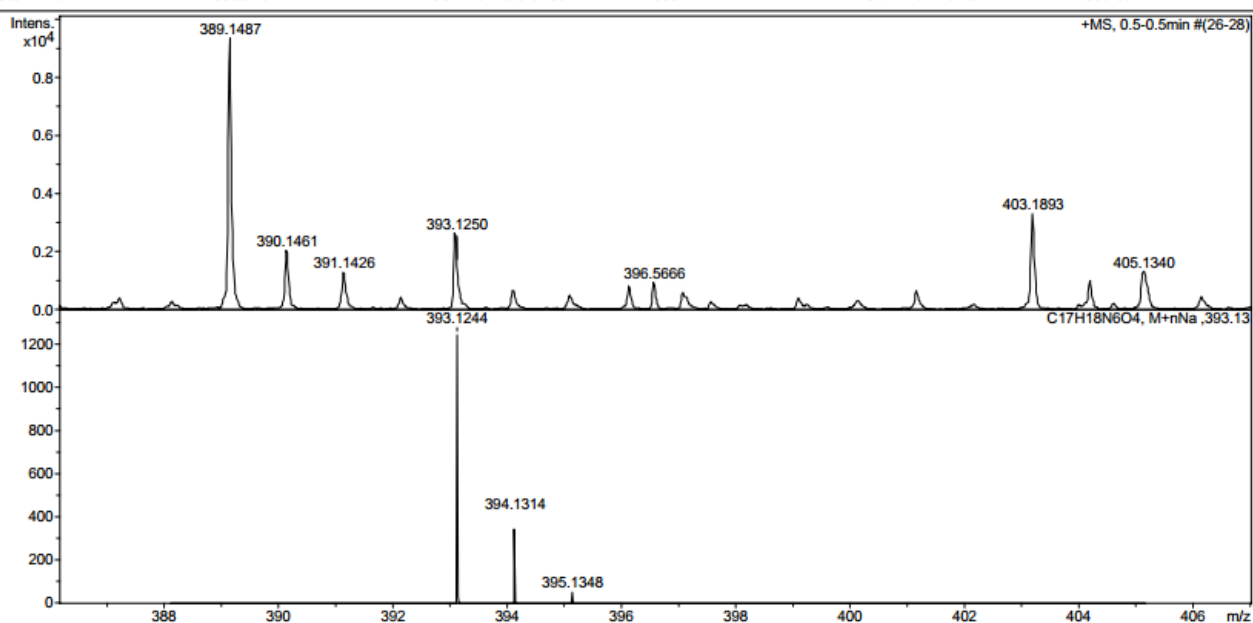

Fig. S44. Mass spectra of **3j**

## Display Report

### Analysis Info

Analysis Name D:\Data\Work\2020\November\01\2\_000011.d  
Method tune\_low\_pos\_07neb.m  
Sample Name  
Comment

Acquisition Date 02-Nov-20 14:36:39

Operator BDAL@DE  
Instrument / Ser# maXis 62

### Acquisition Parameter

|             |          |                      |          |                  |           |
|-------------|----------|----------------------|----------|------------------|-----------|
| Source Type | ESI      | Ion Polarity         | Positive | Set Nebulizer    | 0.7 Bar   |
| Focus       | Active   |                      |          | Set Dry Heater   | 180 °C    |
| Scan Begin  | 100 m/z  | Set Capillary        | 4500 V   | Set Dry Gas      | 4.0 l/min |
| Scan End    | 1100 m/z | Set End Plate Offset | -500 V   | Set Divert Valve | Source    |

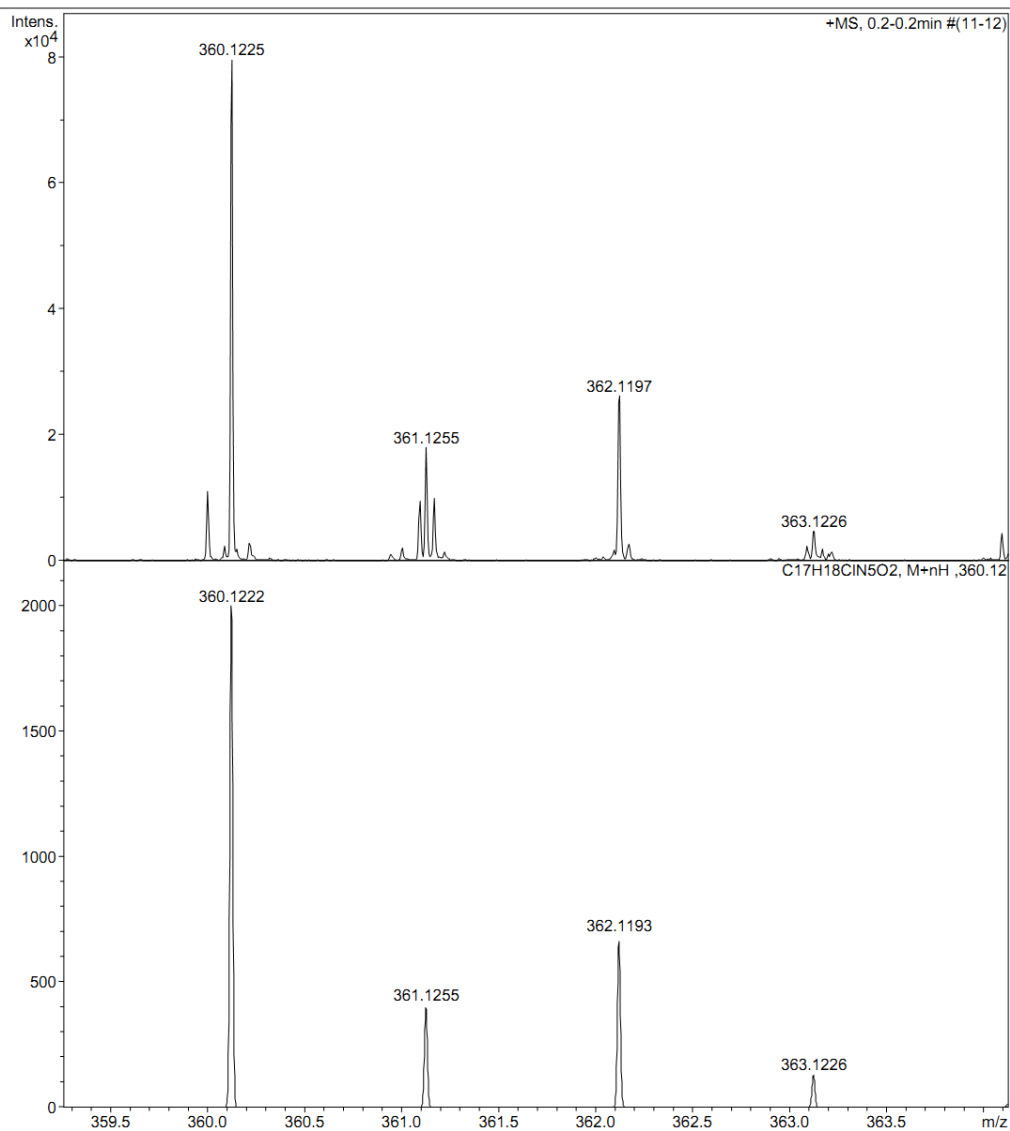

Fig. S45. Mass spectra of **3k**

### 3. IR spectra of compounds

SHIMADZU

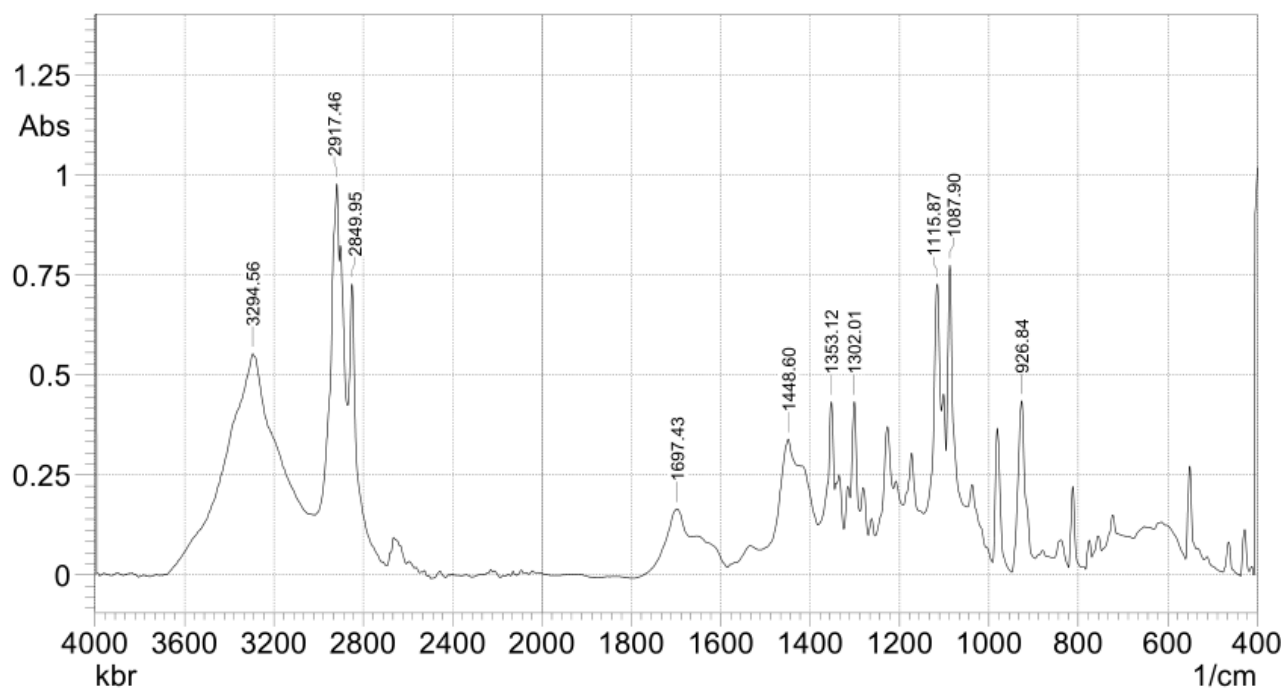

Comment;  
kbr

No. of Scans;  
Resolution;  
Apodization;

Date/Time: 07 10 2020 16:50:06  
Григорьев Я.М.; User

Fig. S46. IR spectra of **3a**

SHIMADZU

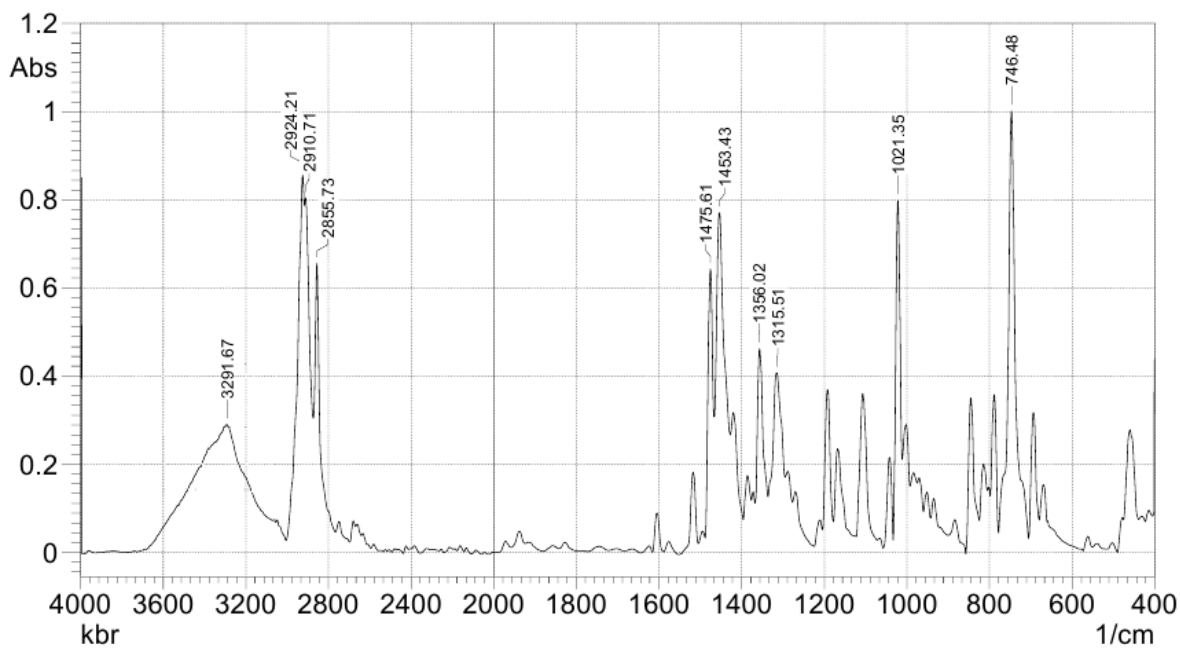

Comment;  
kbr

No. of Scans;  
Resolution;  
Apodization;

Date/Time: 01 10 2020 15:28:12  
Григорьев Я.М.; User

Fig. S47. IR spectra of **3b**

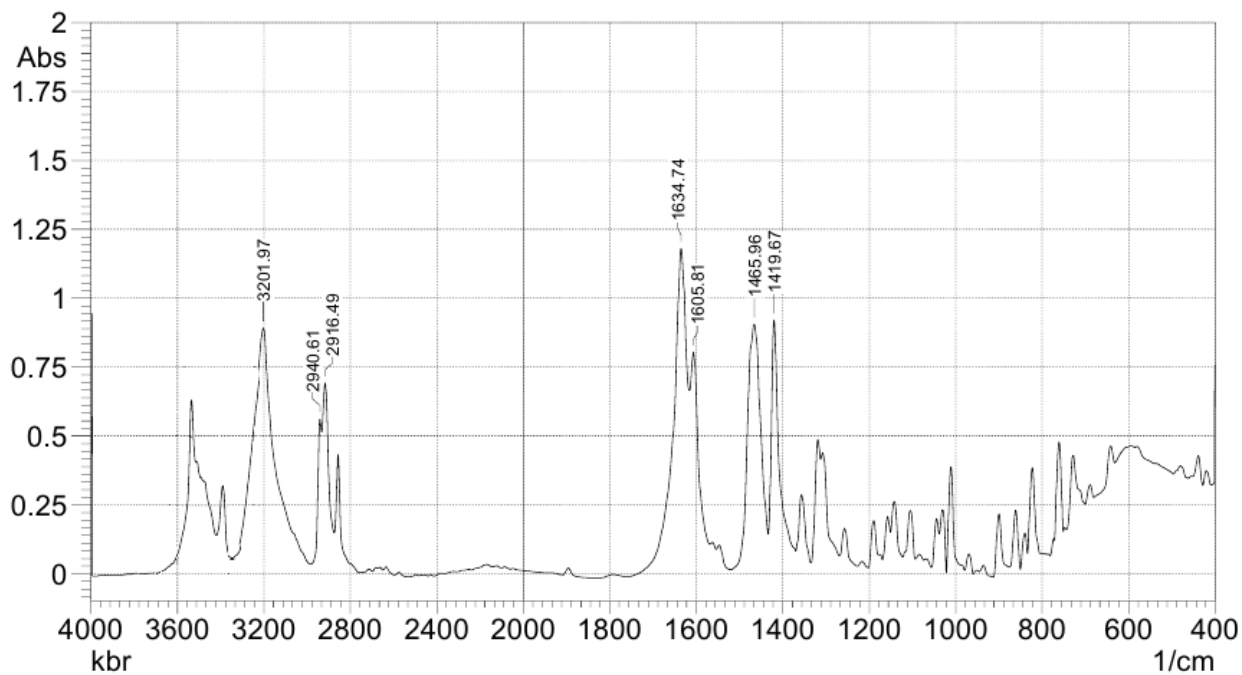

Comment:  
kbr

No. of Scans:  
Resolution;  
Apodization:

Date/Time: 01 10 2020 15:38:42  
Григорьев Я.М.; User

Fig. S48. IR spectra of **3e**

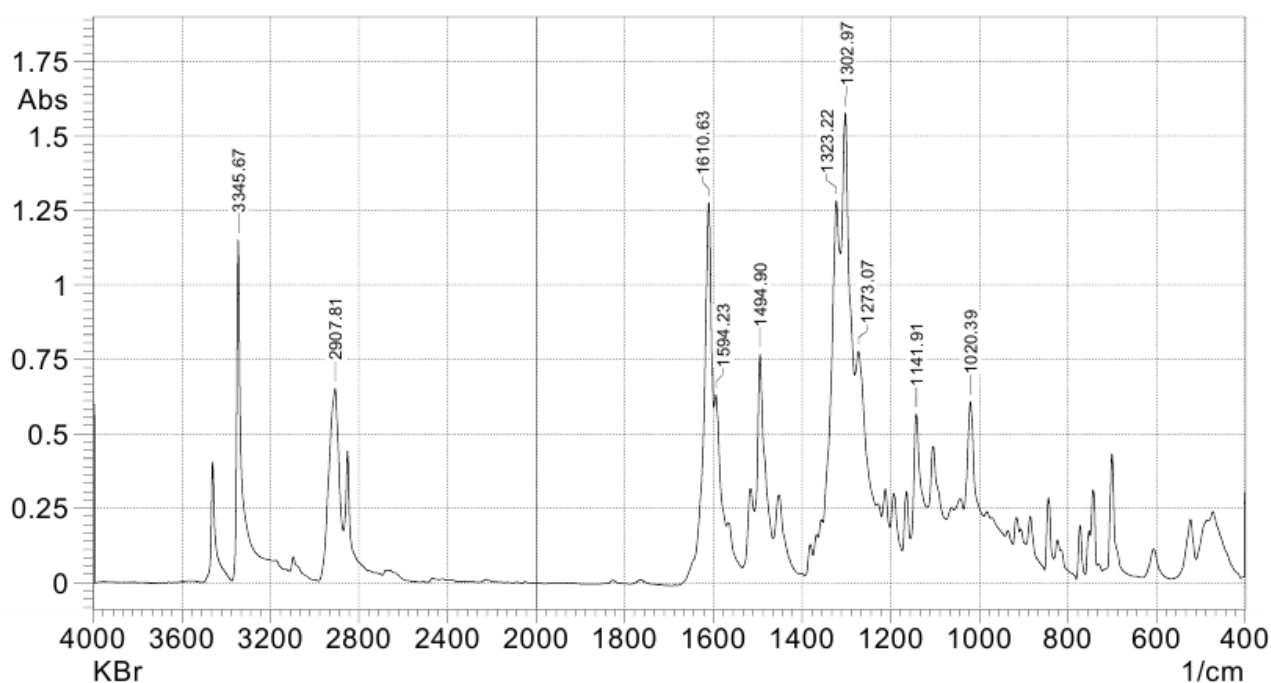

Comment:  
KBr

No. of Scans:  
Resolution;  
Apodization:

Date/Time: 21 10 2020 17:20:24  
Григорьев Я.М.; User

Fig. S49. IR spectra of **3i**

## 5. XRD Data

Bond precision: C-C = 0.0023 Å      Wavelength=1.54184

Cell:            a=9.8279(2)      b=12.8485(2)      c=12.7327(3)  
                  alpha=90            beta=104.543(2)      gamma=90

Temperature:    100 K

|                | Calculated   | Reported     |
|----------------|--------------|--------------|
| Volume         | 1556.29(6)   | 1556.29(6)   |
| Space group    | P 21/c       | P 1 21/c 1   |
| Hall group     | -P 2ybc      | -P 2ybc      |
| Moiety formula | C18 H22 N4   | C18 H22 N4   |
| Sum formula    | C18 H22 N4   | C18 H22 N4   |
| Mr             | 294.40       | 294.39       |
| Dx, g cm-3     | 1.257        | 1.256        |
| Z              | 4            | 4            |
| Mu (mm-1)      | 0.597        | 0.597        |
| F000           | 632.0        | 632.0        |
| F000'          | 633.65       |              |
| h, k, lmax     | 12, 16, 16   | 12, 15, 16   |
| Nref           | 3251         | 3172         |
| Tmin, Tmax     | 0.867, 0.971 | 0.713, 1.000 |
| Tmin'          | 0.867        |              |

Correction method= # Reported T Limits: Tmin=0.713 Tmax=1.000  
AbsCorr = MULTI-SCAN

Data completeness= 0.976      Theta(max)= 76.085

R(reflections)= 0.0565( 2749)      wR2(reflections)= 0.1639( 3172)

S = 1.111      Npar= 200

Fig. S50. XRD data of **3b**

Bond precision: C-C = 0.0035 Å      Wavelength=1.54184

Cell:            a=7.2294(1)      b=21.6410(3)      c=10.2631(2)  
                  alpha=90            beta=91.291(1)      gamma=90

Temperature:    100 K

|                | Calculated       | Reported         |
|----------------|------------------|------------------|
| Volume         | 1605.27(4)       | 1605.27(4)       |
| Space group    | P 21/n           | P 1 21/n 1       |
| Hall group     | -P 2yn           | -P 2yn           |
| Moiety formula | C17 H18.48 Cl N5 | C17 H18.48 Cl N5 |
| Sum formula    | C17 H18.48 Cl N5 | C17 H18.48 Cl N5 |
| Mr             | 328.30           | 328.30           |
| Dx, g cm-3     | 1.358            | 1.358            |
| Z              | 4                | 4                |
| Mu (mm-1)      | 2.154            | 2.154            |
| F000           | 689.9            | 690.0            |
| F000'          | 693.08           |                  |
| h, k, lmax     | 8, 26, 12        | 8, 26, 12        |
| Nref           | 3078             | 3073             |
| Tmin, Tmax     | 0.643, 0.724     | 0.765, 1.000     |
| Tmin'          | 0.568            |                  |

Correction method= # Reported T Limits: Tmin=0.765 Tmax=1.000  
AbsCorr = MULTI-SCAN

Data completeness= 0.998      Theta(max)= 70.478

R(reflections)= 0.0530( 2818)      wR2(reflections)= 0.1504( 3073)

S = 1.082      Npar= 243

Fig. S51. XRD data of **3c**

Bond precision: C-C = 0.0019 Å      Wavelength=1.54184

Cell:            a=7.0477(1)    b=17.9831(3)    c=14.1252(3)  
                   alpha=90        beta=104.454(2)    gamma=90

Temperature:    100 K

|                        | Calculated       | Reported         |
|------------------------|------------------|------------------|
| Volume                 | 1733.56(6)       | 1733.56(6)       |
| Space group            | P 21/n           | P 1 21/n 1       |
| Hall group             | -P 2yn           | -P 2yn           |
| Moiety formula         | C18 H18 Cl F3 N4 | C18 H18 Cl F3 N4 |
| Sum formula            | C18 H18 Cl F3 N4 | C18 H18 Cl F3 N4 |
| Mr                     | 382.81           | 382.81           |
| Dx, g cm <sup>-3</sup> | 1.467            | 1.467            |
| Z                      | 4                | 4                |
| Mu (mm <sup>-1</sup> ) | 2.320            | 2.320            |
| F000                   | 792.0            | 792.0            |
| F000'                  | 795.99           |                  |
| h, k, lmax             | 8, 22, 17        | 8, 22, 17        |
| Nref                   | 3617             | 3429             |
| Tmin, Tmax             | 0.455, 0.740     | 0.680, 1.000     |
| Tmin'                  | 0.292            |                  |

Correction method= # Reported T Limits: Tmin=0.680 Tmax=1.000  
 AbsCorr = MULTI-SCAN

Data completeness= 0.948      Theta(max)= 76.124

R(reflections)= 0.0332( 3286)      wR2(reflections)= 0.0906( 3429)

S = 1.063      Npar= 235

Fig. S52. XRD data of **3f**

Bond precision: C-C = 0.0063 Å      Wavelength=1.54184

Cell:            a=31.7414(6)    b=15.3710(3)    c=6.4665(2)  
                   alpha=90        beta=90        gamma=90

Temperature:    100 K

|                        | Calculated    | Reported          |
|------------------------|---------------|-------------------|
| Volume                 | 3154.99(13)   | 3154.99(13)       |
| Space group            | P 21 21 2     | P 21 21 2         |
| Hall group             | P 2 2ab       | P 2 2ab           |
| Moiety formula         | C17 H19 N5 O3 | 2 (C17 H19 N5 O3) |
| Sum formula            | C17 H19 N5 O3 | C34 H38 N10 O6    |
| Mr                     | 341.37        | 682.74            |
| Dx, g cm <sup>-3</sup> | 1.437         | 1.437             |
| Z                      | 8             | 4                 |
| Mu (mm <sup>-1</sup> ) | 0.841         | 0.841             |
| F000                   | 1440.0        | 1440.0            |
| F000'                  | 1444.54       |                   |
| h, k, lmax             | 38, 18, 7     | 38, 18, 7         |
| Nref                   | 6103[ 3503]   | 6032              |
| Tmin, Tmax             | 0.868, 0.992  | 0.334, 1.000      |
| Tmin'                  | 0.824         |                   |

Correction method= # Reported T Limits: Tmin=0.334 Tmax=1.000  
 AbsCorr = MULTI-SCAN

Data completeness= 1.72/0.99      Theta(max)= 71.085

R(reflections)= 0.0683( 5508)      wR2(reflections)= 0.1392( 6032)

S = 1.103      Npar= 454

Fig. S53. XRD data of **3g**



## 6. DSC/TG analysis of compound 3g

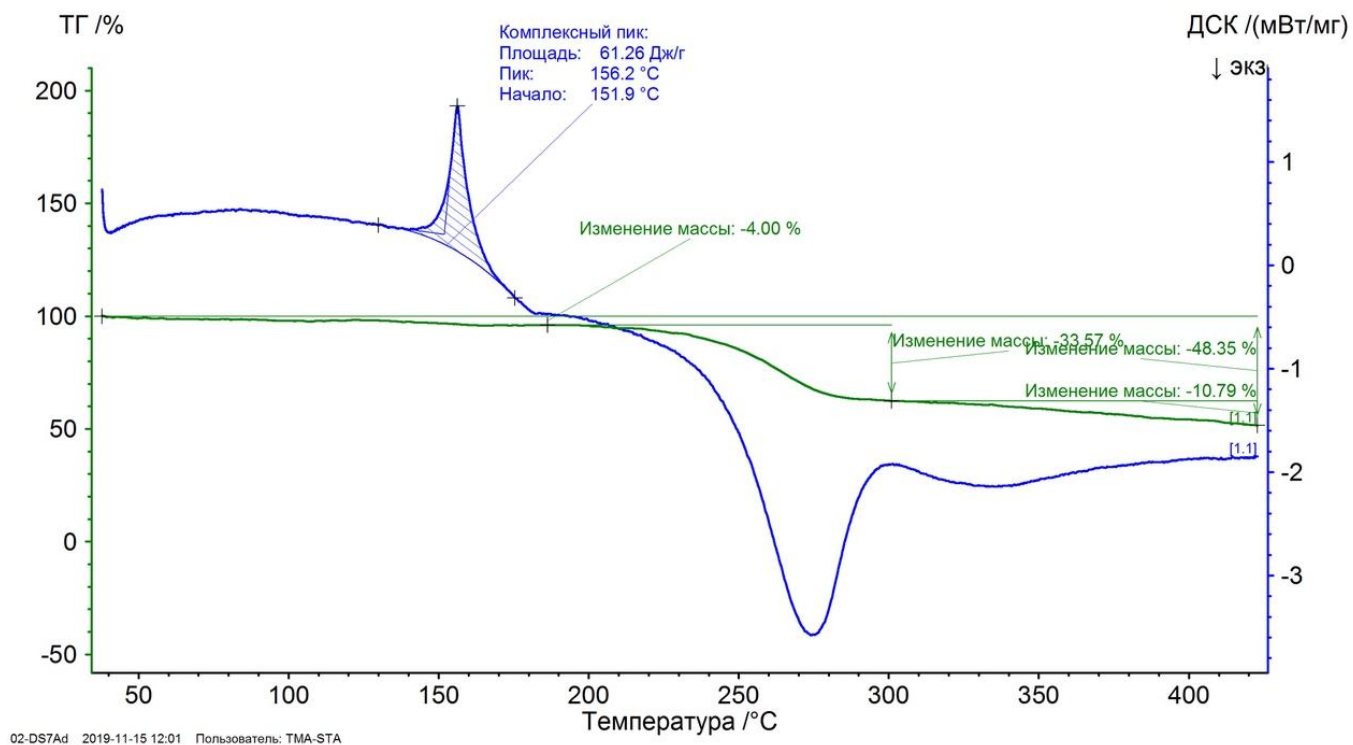

Fig. S54. DSC/TG analysis of compound of **3g**
